# Supplementary material for: [3,3]-Sigmatropic rearrangement of allenic alcohols: stereoselective synthesis of 1,3-diene-2-ol sulfonates
Source: Royal Society of Chemistry journal article supplement (doi:10.1039/c7ob00578d), 2017-01-01

**[3, 3]-Sigmatropic Rearrangement of Allenic Alcohols: Stereoselective Synthesis  
of 1,3-Diene-2-ol Sulfonates**

Yuyang Zhao <sup>a,b</sup>, Yurong Wang <sup>a</sup>, Zhanshou Gu <sup>b</sup>, Zhiming Wang <sup>a,b,\*</sup>

<sup>a</sup> College of Pharmaceutical Science, Zhejiang Chinese Medical University,

Hangzhou, Zhejiang 311400, P. R. China

<sup>b</sup> School of Petrochemical Engineering, Changzhou University, Changzhou,

Jiangsu 213164, P. R. China.

[wzmmol@hotmail.com](mailto:wzmmol@hotmail.com); [zhiming@cczu.edu.cn](mailto:zhiming@cczu.edu.cn)

**Supporting Information**

**List of contents**

|                                                                                          |         |
|------------------------------------------------------------------------------------------|---------|
| <sup>1</sup> H NMR and <sup>13</sup> C NMR spectra copies of compounds <b>2h, 2o</b>     | S2-S3   |
| <sup>1</sup> H NMR and <sup>13</sup> C NMR spectra copies of compounds <b>3a-t</b>       | S4-S23  |
| <sup>1</sup> H NMR, <sup>13</sup> C NMR and NOESY spectra copies of compounds <b>4-8</b> | S23-S32 |

# <sup>1</sup>H and <sup>13</sup>C NMR Spectra of 2

## <sup>1</sup>H NMR spectrum of compound 2h

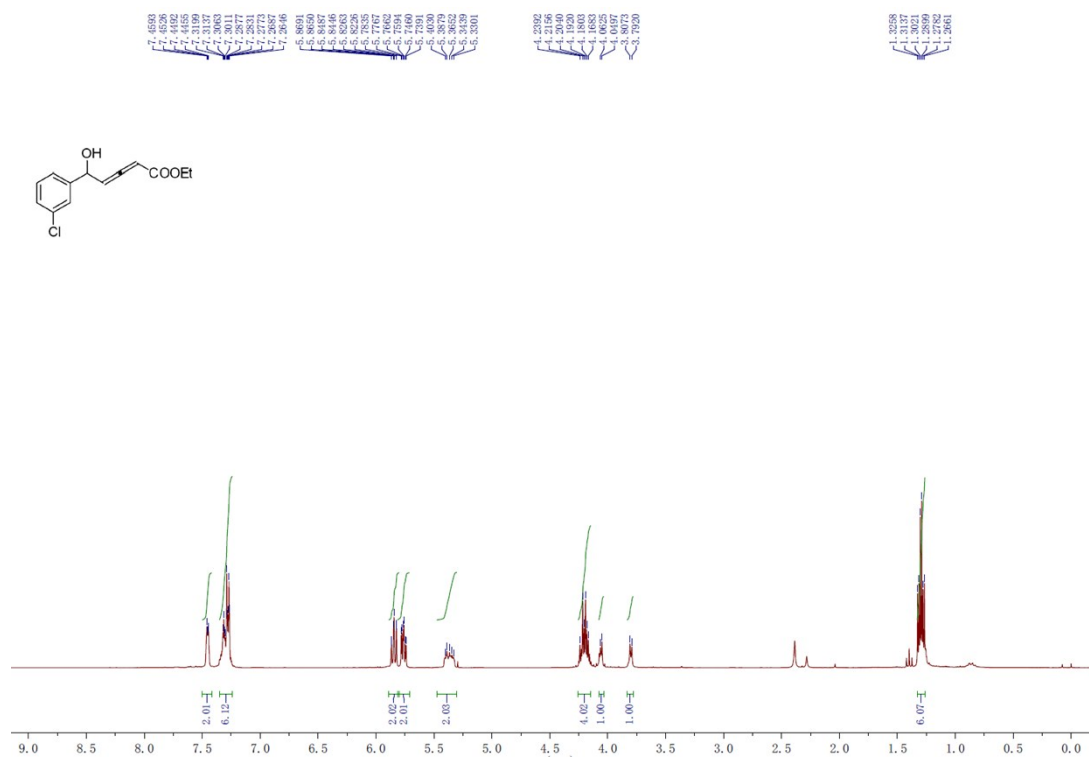



# $^1\text{H}$ and $^{13}\text{C}$ NMR Spectra of 3

## $^1\text{H}$ NMR spectrum of compound 3a

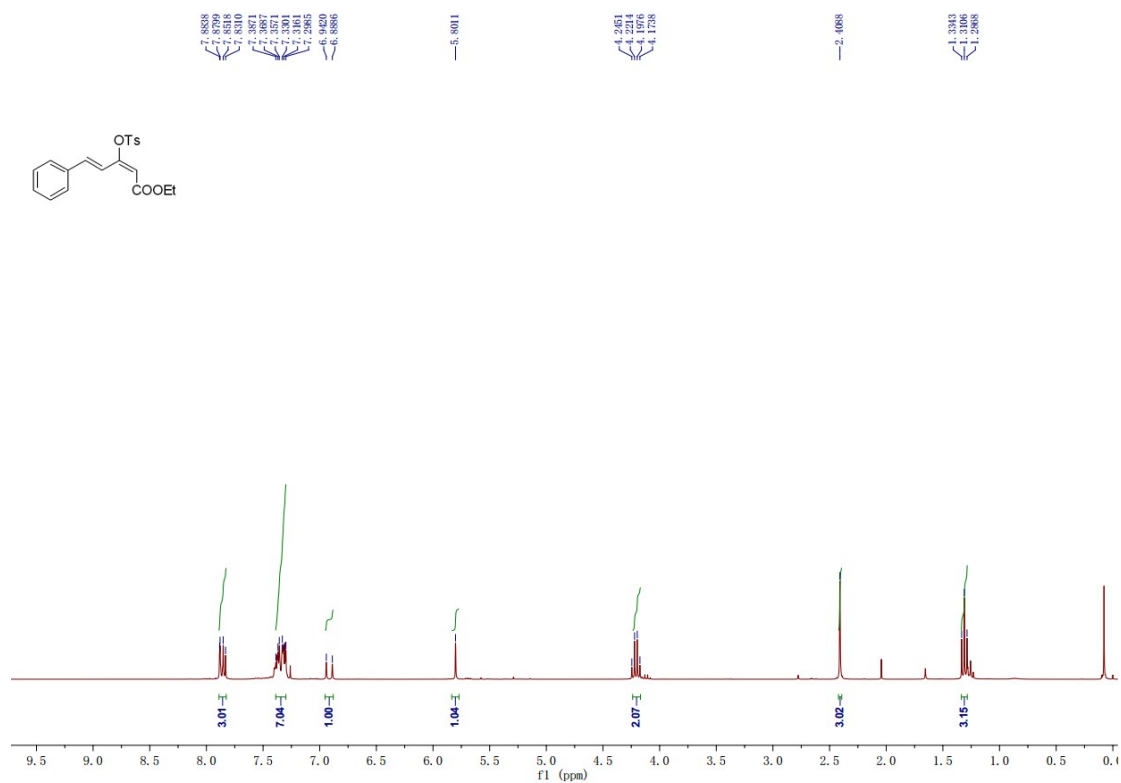

## $^{13}\text{C}$ NMR spectrum of compound 3a

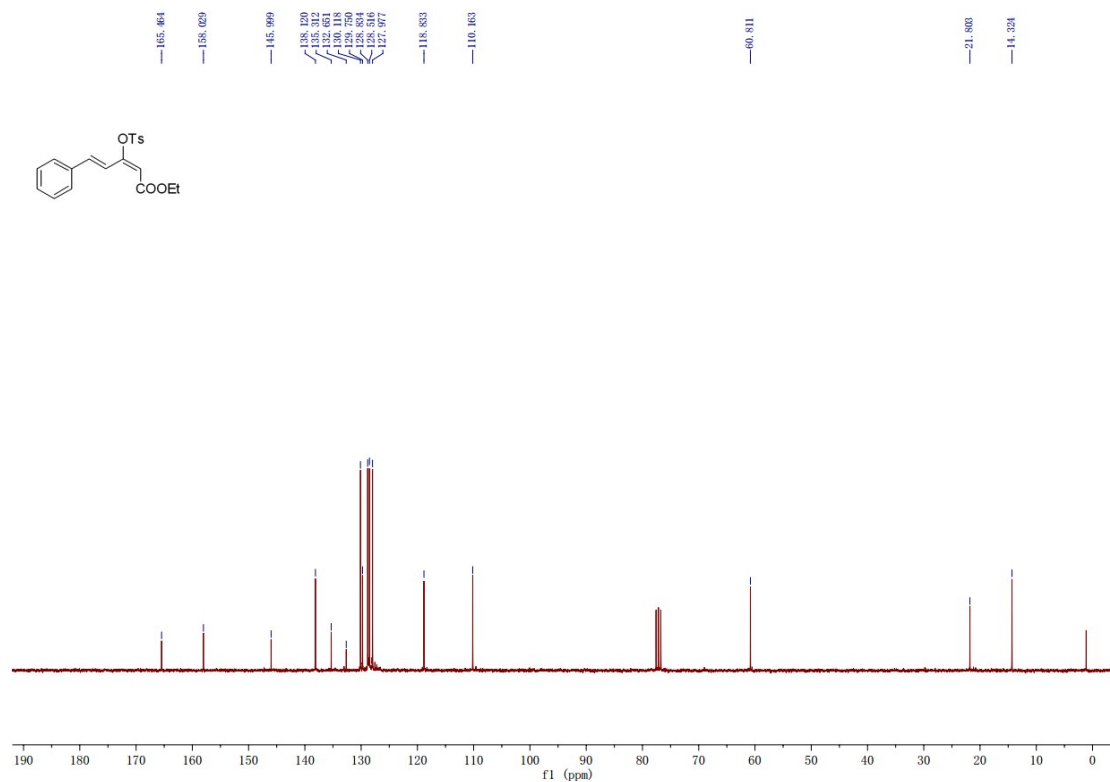

### <sup>1</sup>H NMR spectrum of compound 3b

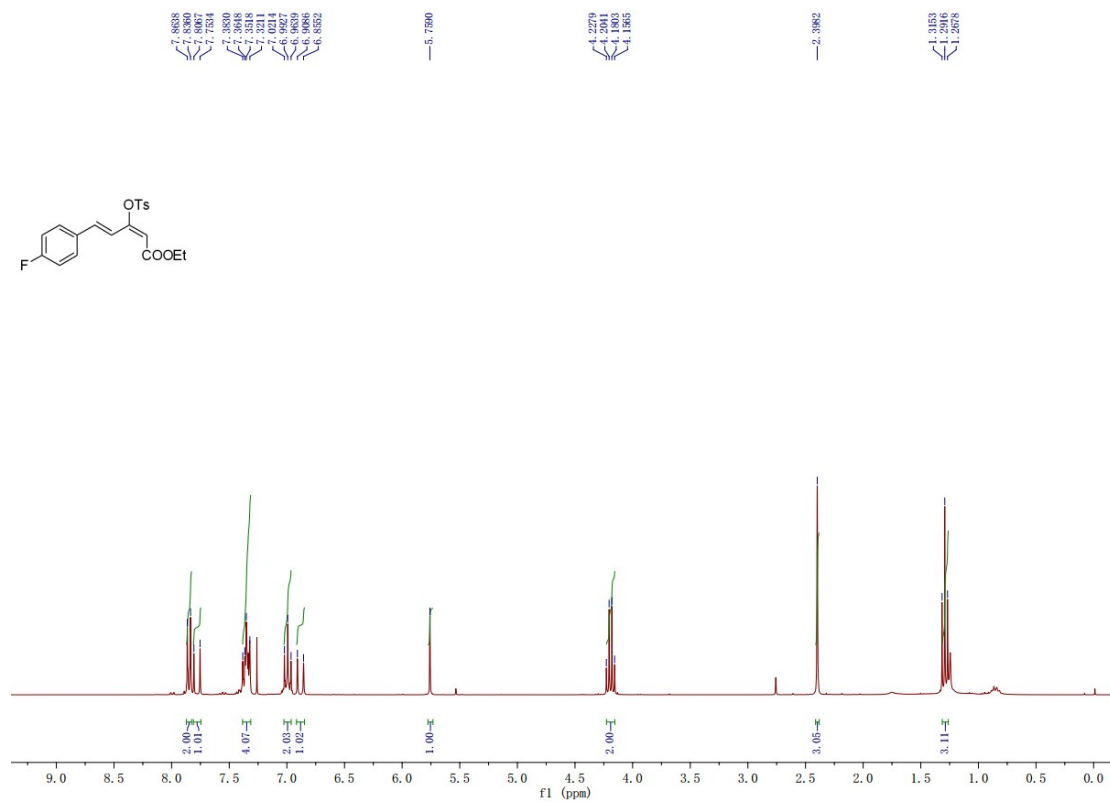

### <sup>13</sup>C NMR spectrum of compound 3b

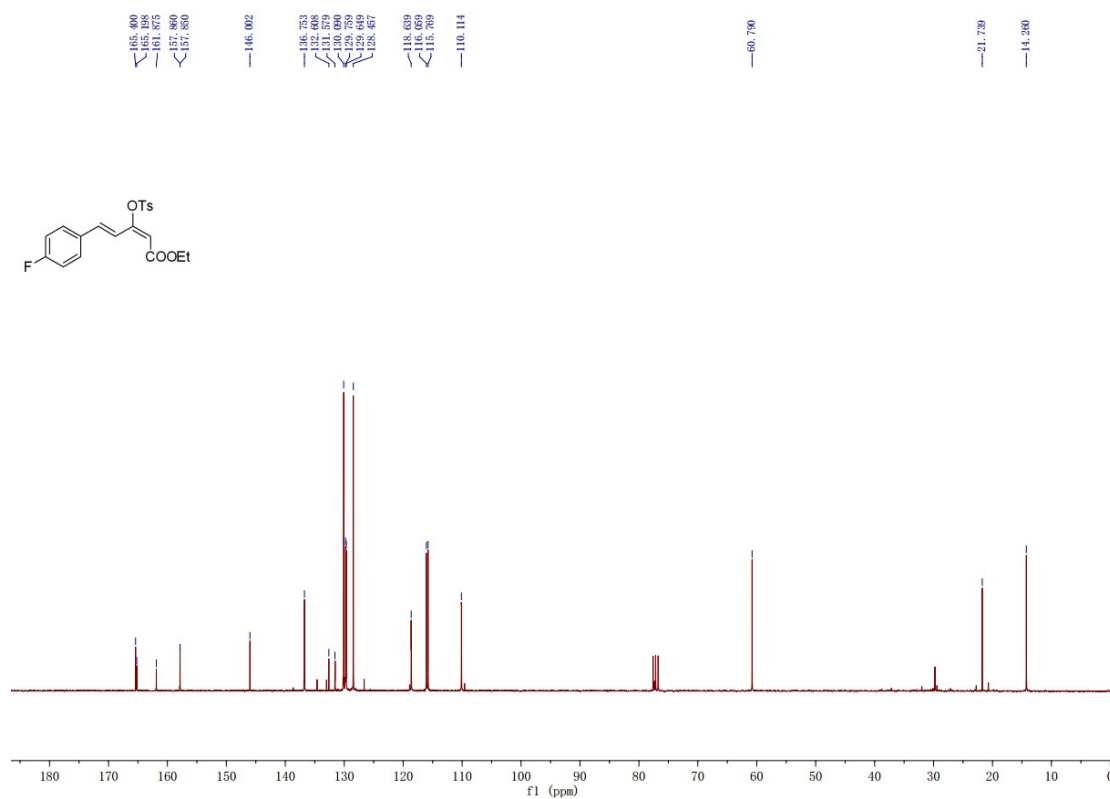

### <sup>1</sup>H NMR spectrum of compound 3c

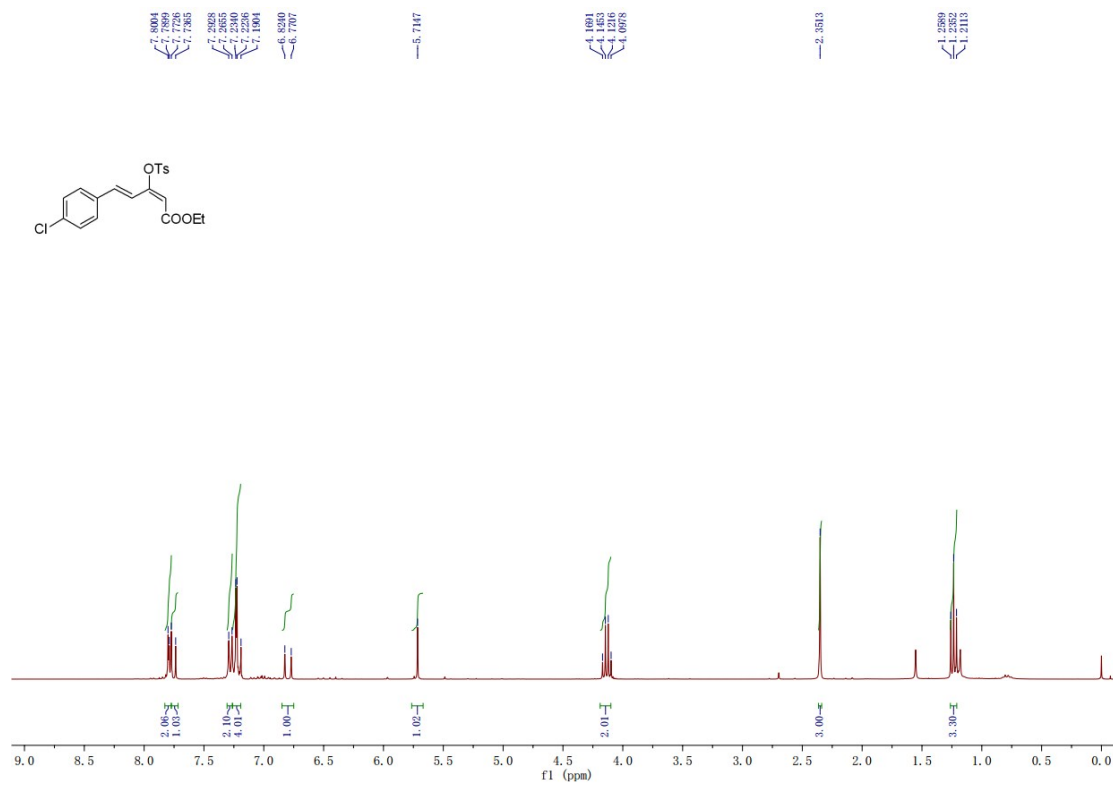

### <sup>13</sup>C NMR spectrum of compound 3c

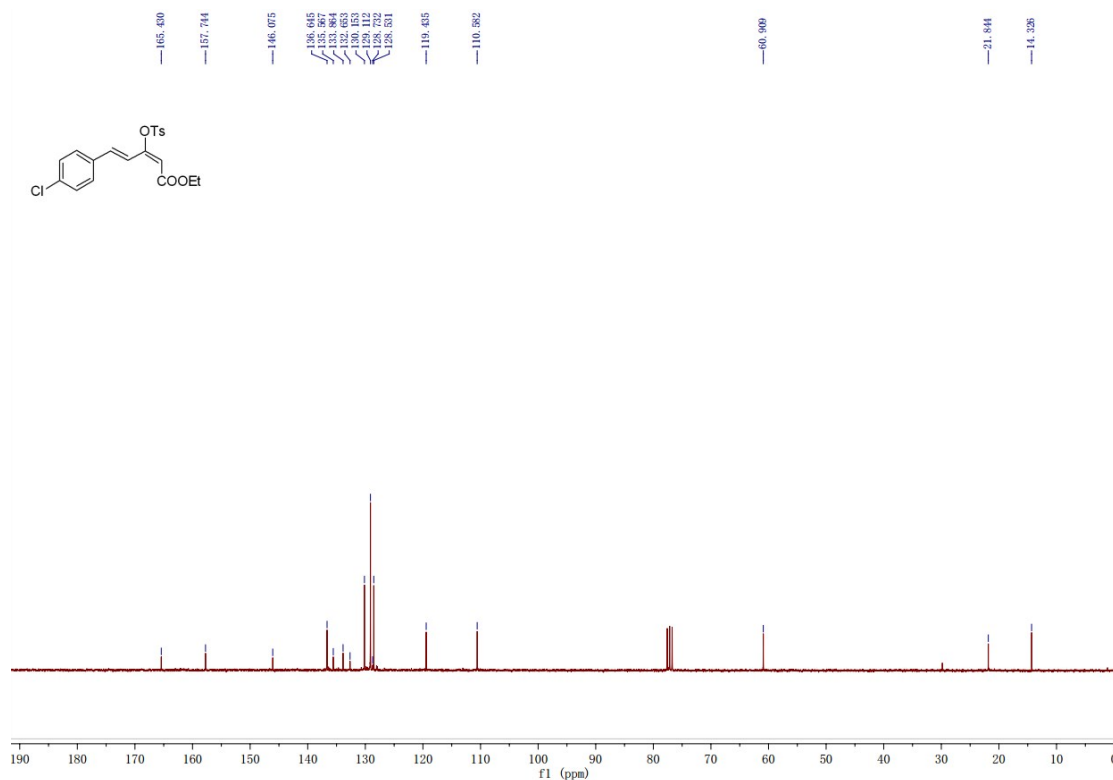

### <sup>1</sup>H NMR spectrum of compound 3d

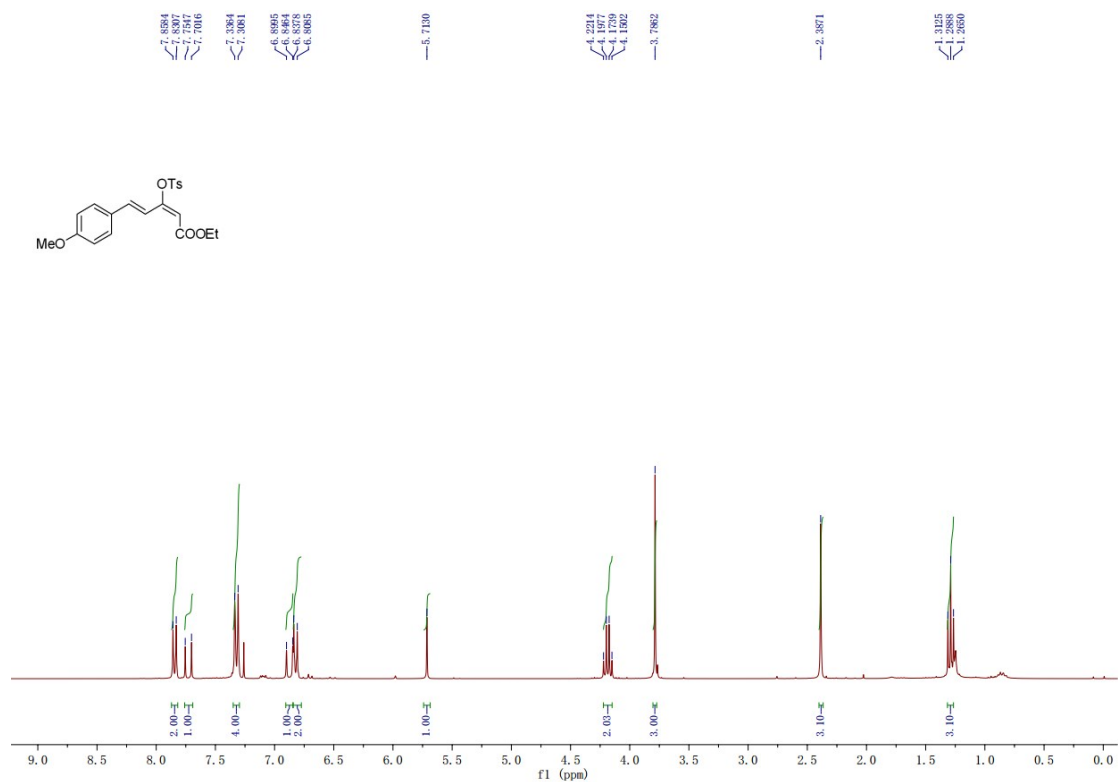

### <sup>13</sup>C NMR spectrum of compound 3d

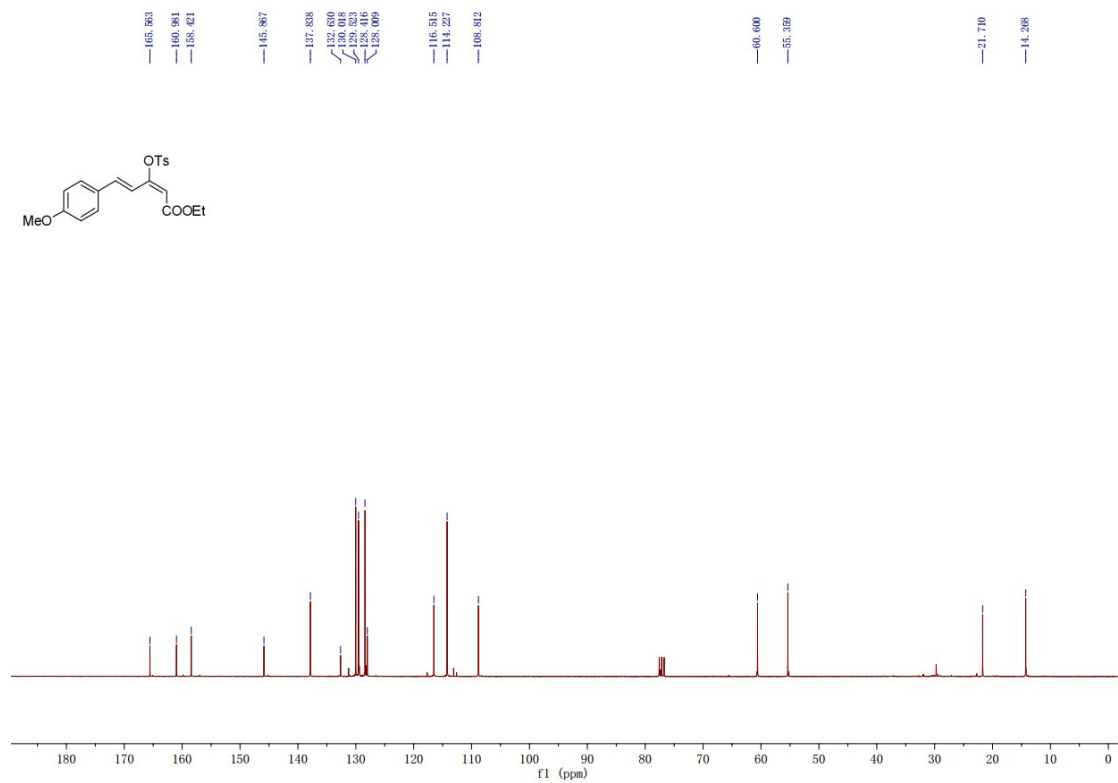

# <sup>1</sup>H NMR spectrum of compound 3e

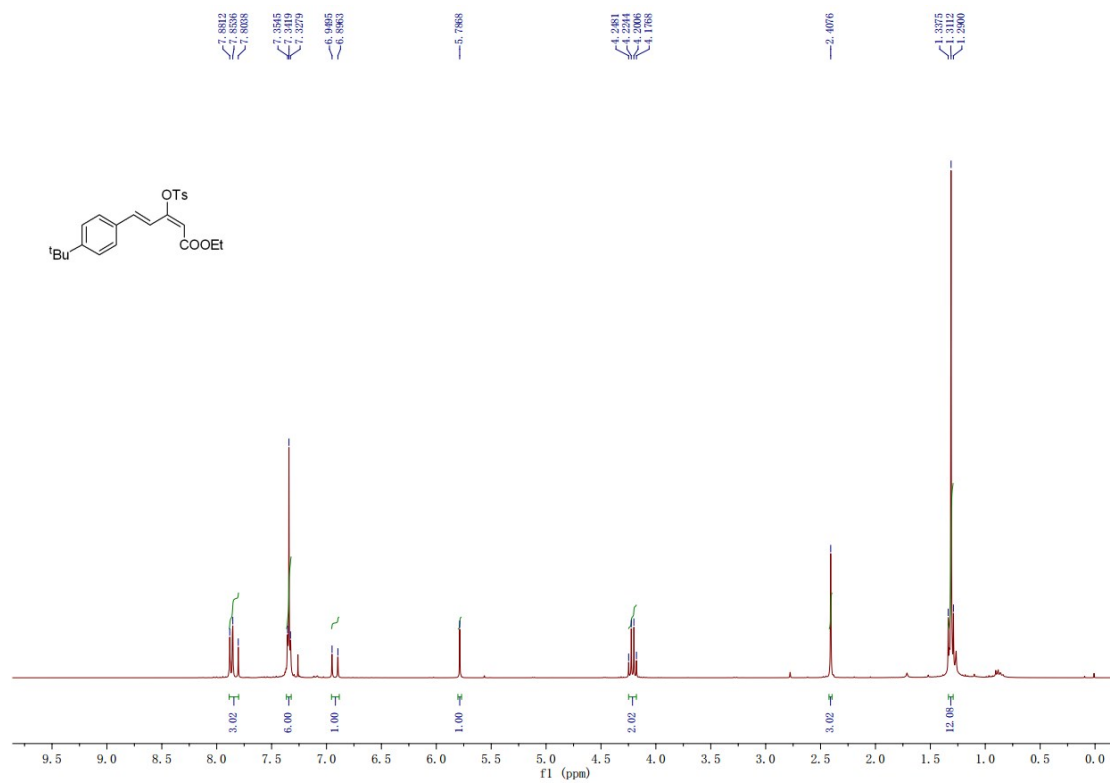

# <sup>13</sup>C NMR spectrum of compound 3e

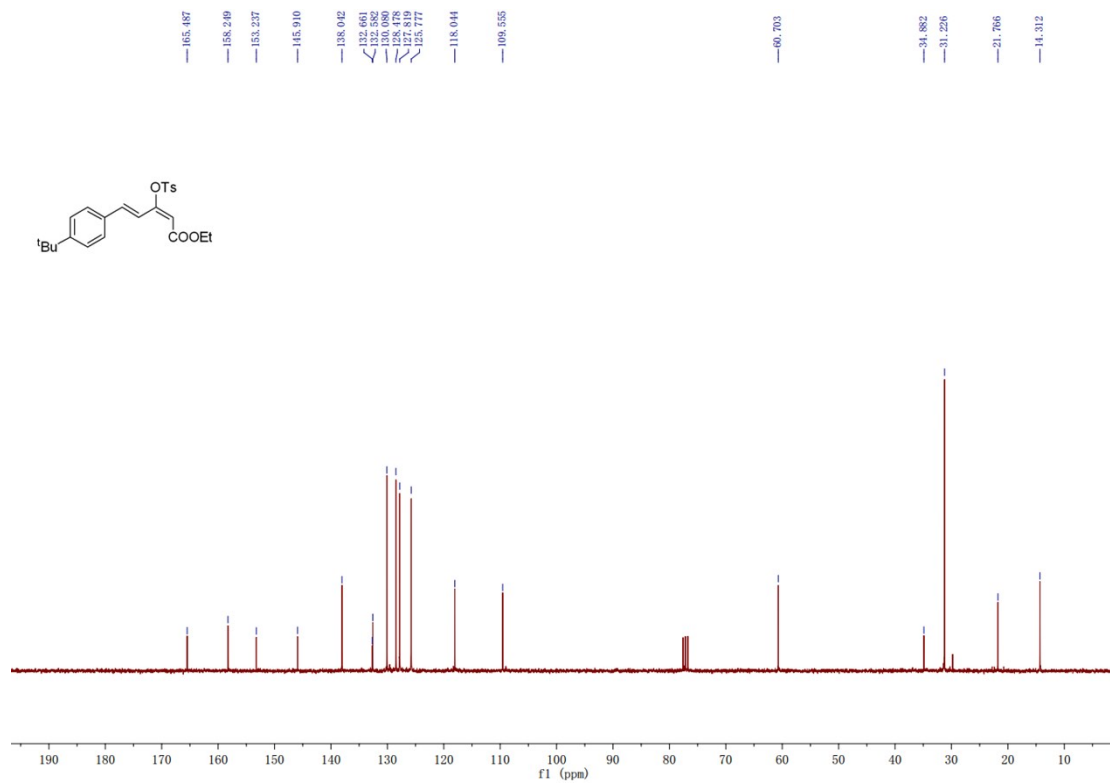



# <sup>1</sup>H NMR spectrum of compound 3f

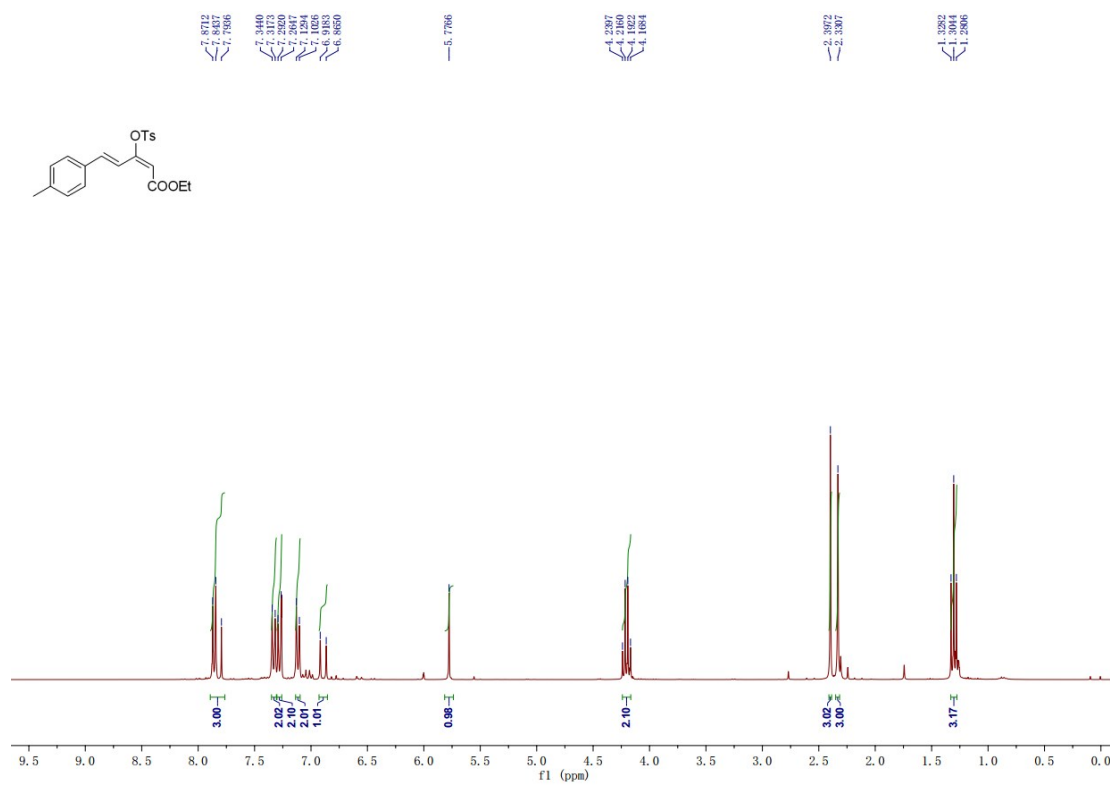

# <sup>13</sup>C NMR spectrum of compound 3f

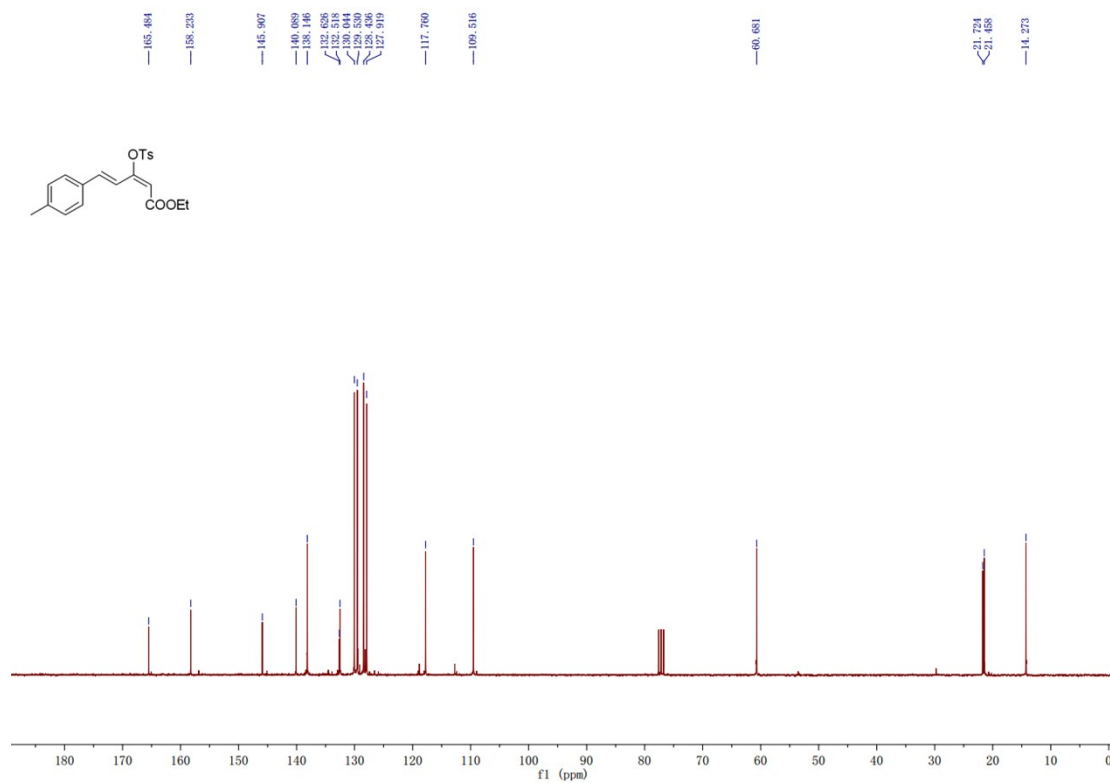

# <sup>1</sup>H NMR spectrum of compound 3g

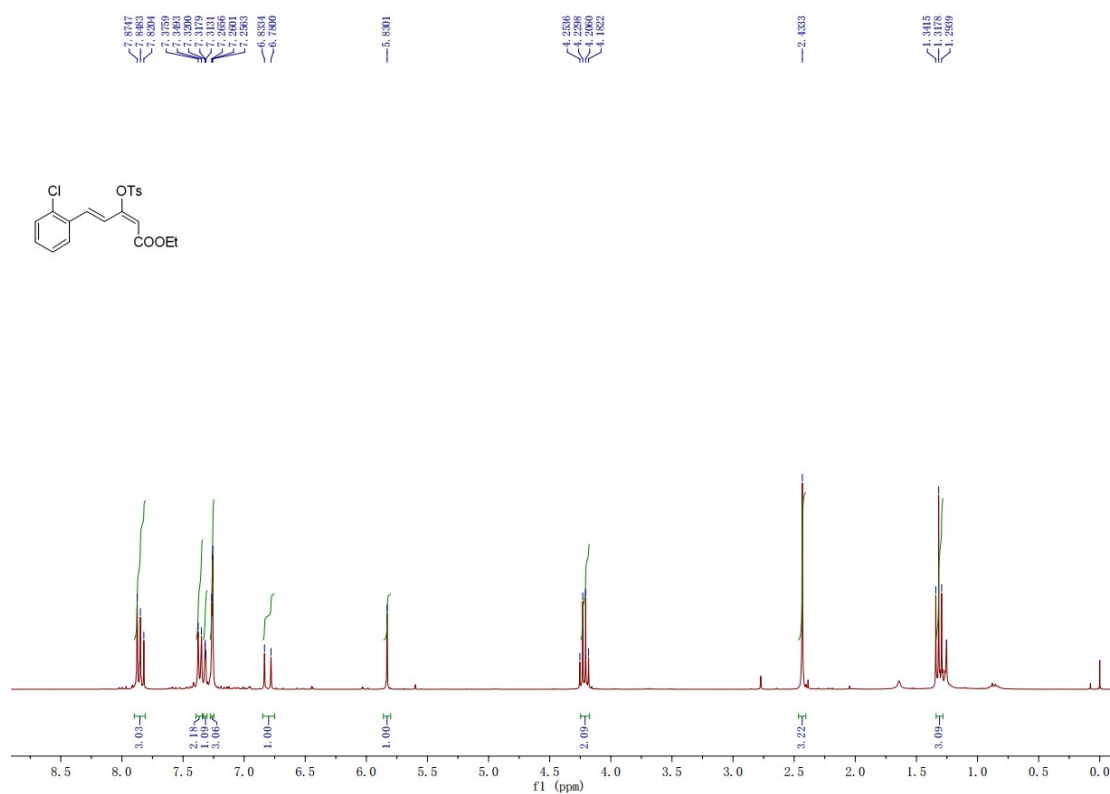

# <sup>13</sup>C NMR spectrum of compound 3g

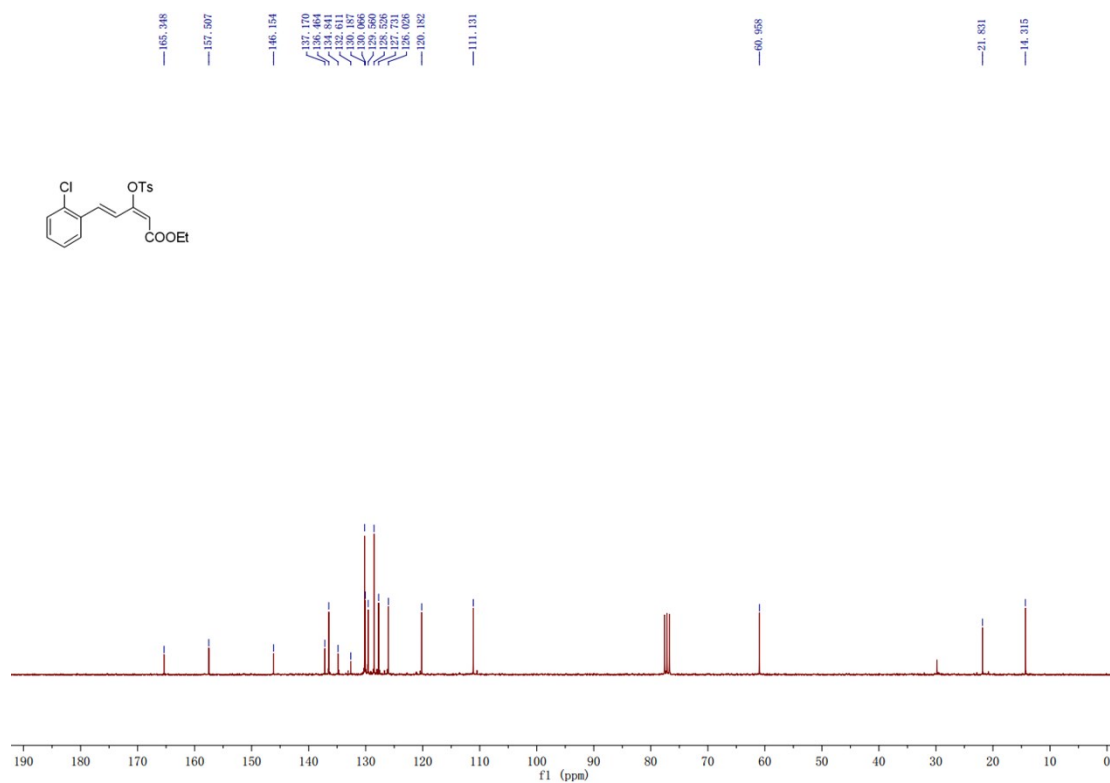

### <sup>1</sup>H NMR spectrum of compound 3h

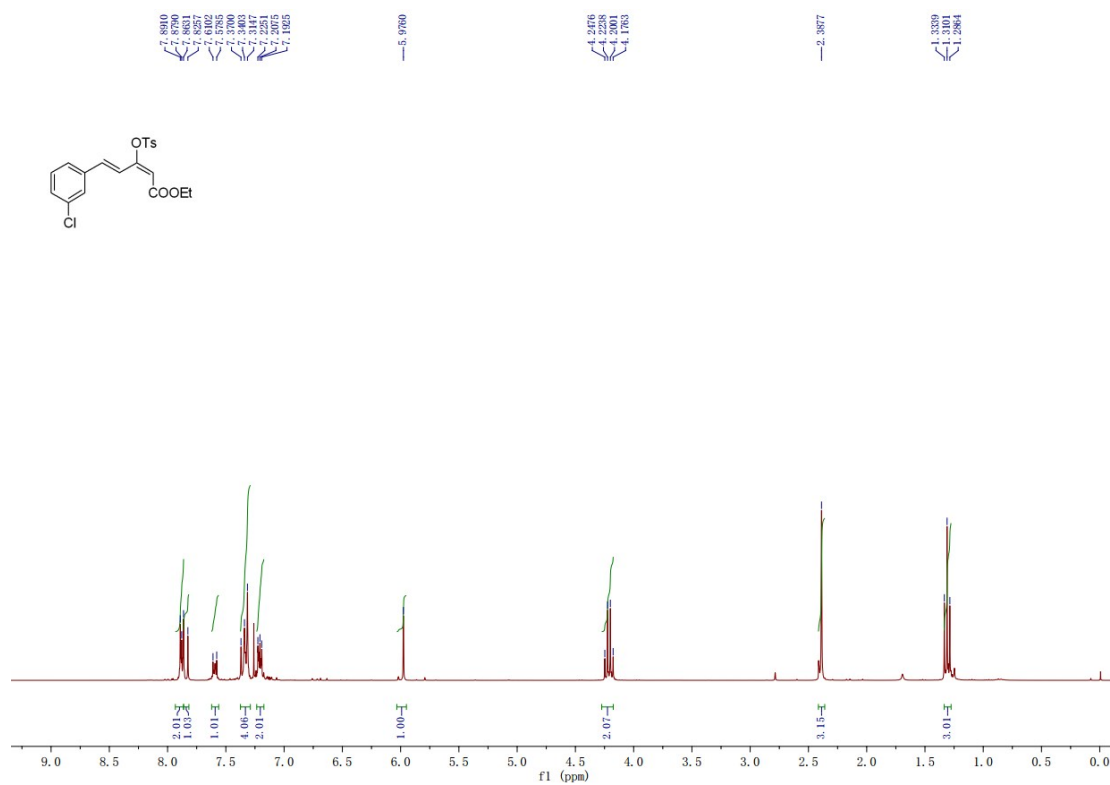

### <sup>13</sup>C NMR spectrum of compound 3h

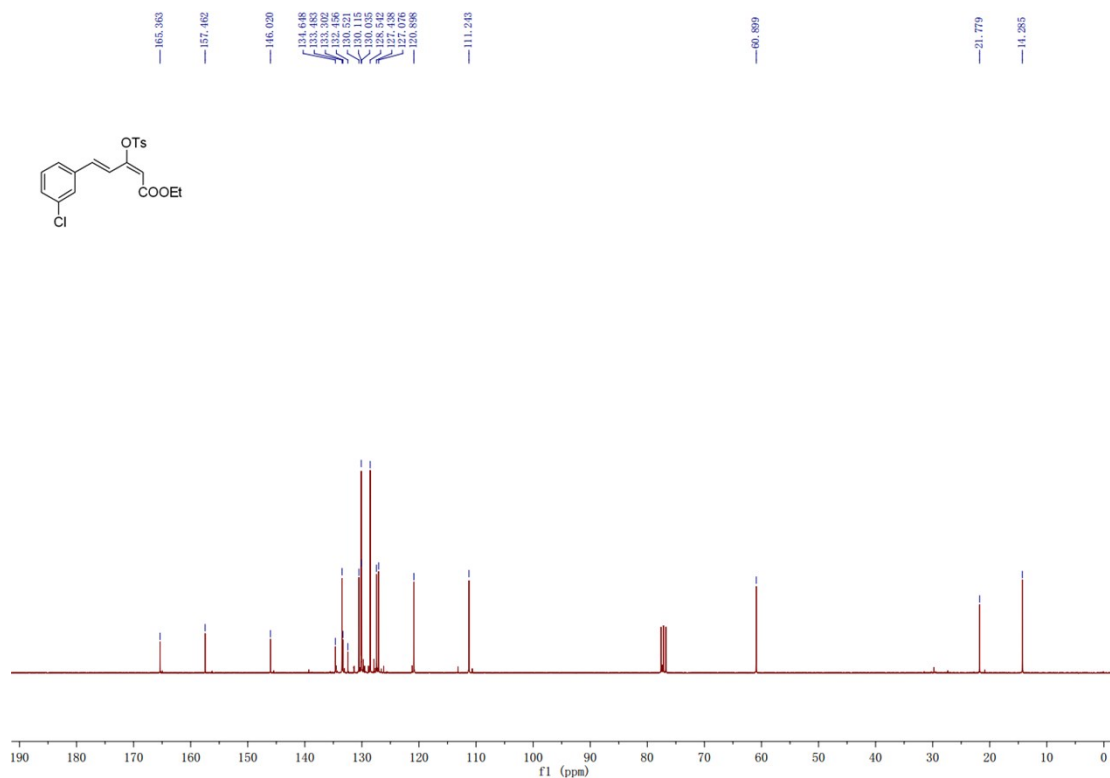

### <sup>1</sup>H NMR spectrum of compound 3i

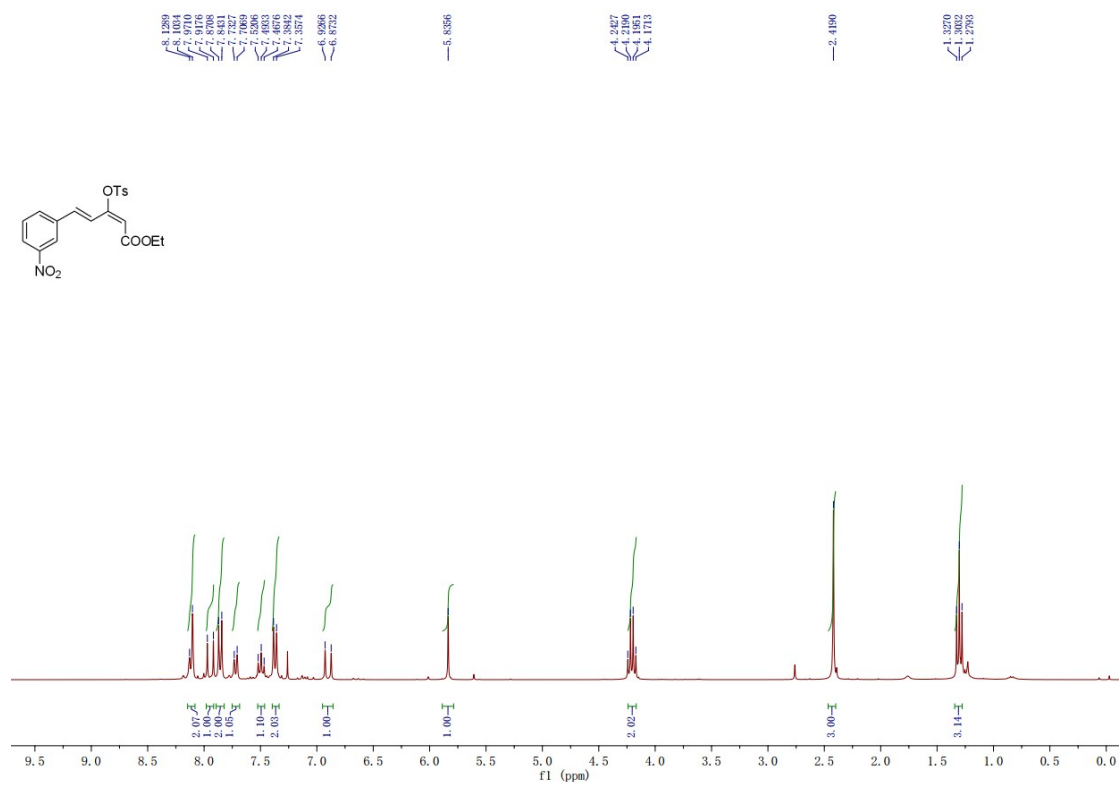

### <sup>13</sup>C NMR spectrum of compound 3i

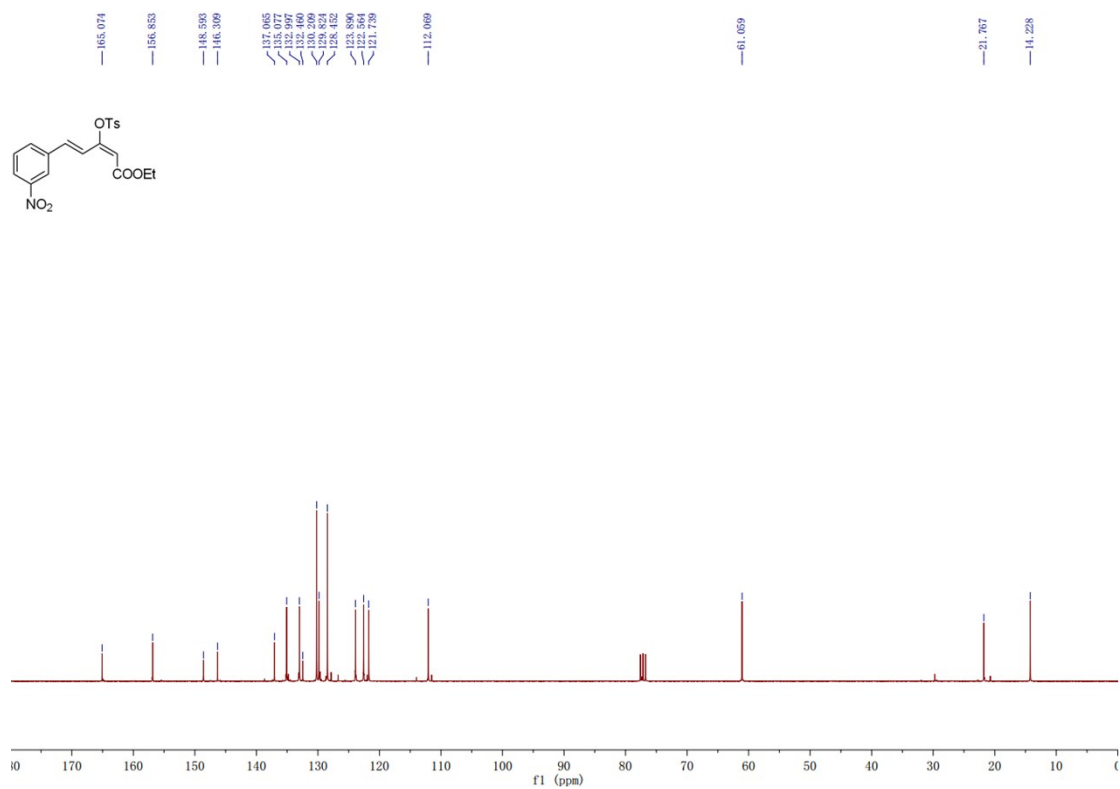

### <sup>1</sup>H NMR spectrum of compound 3j

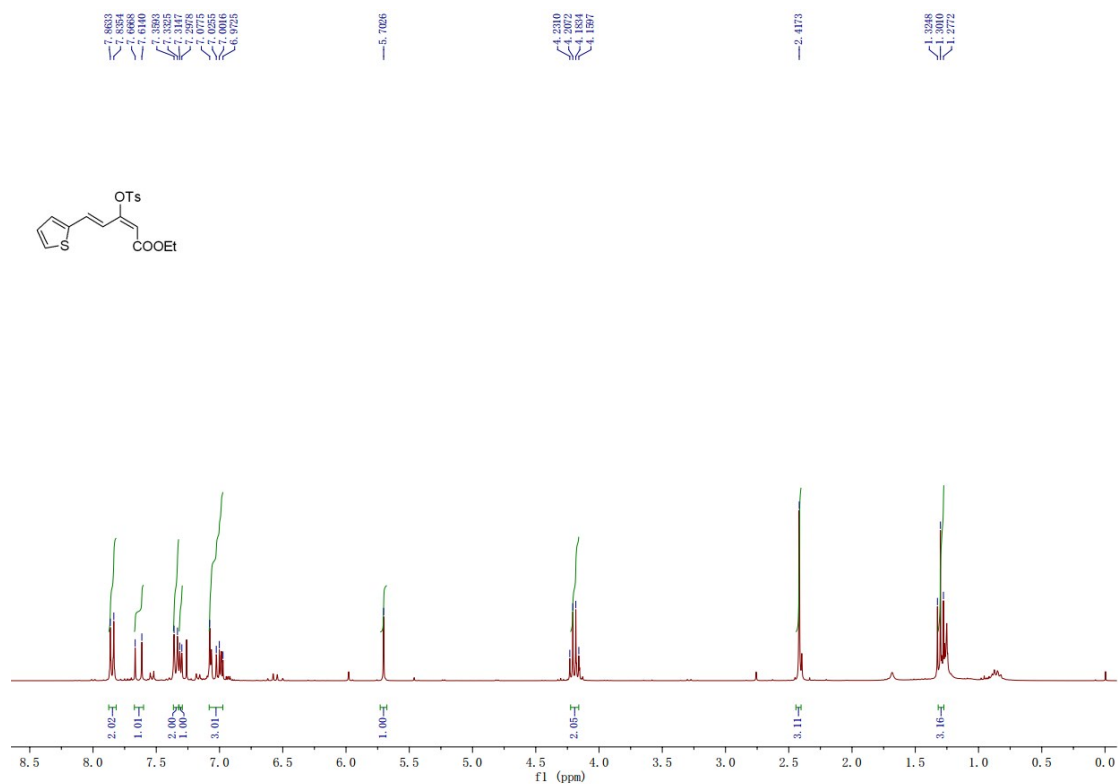

### <sup>13</sup>C NMR spectrum of compound 3j

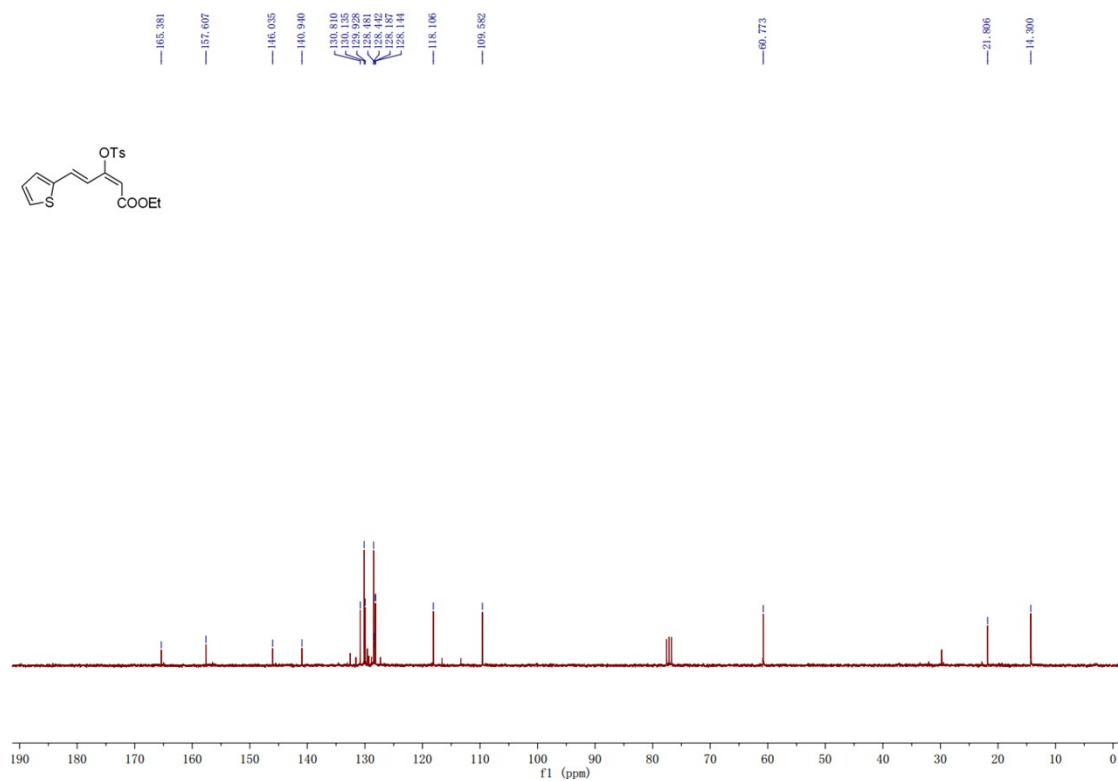

### <sup>1</sup>H NMR spectrum of compound 3k

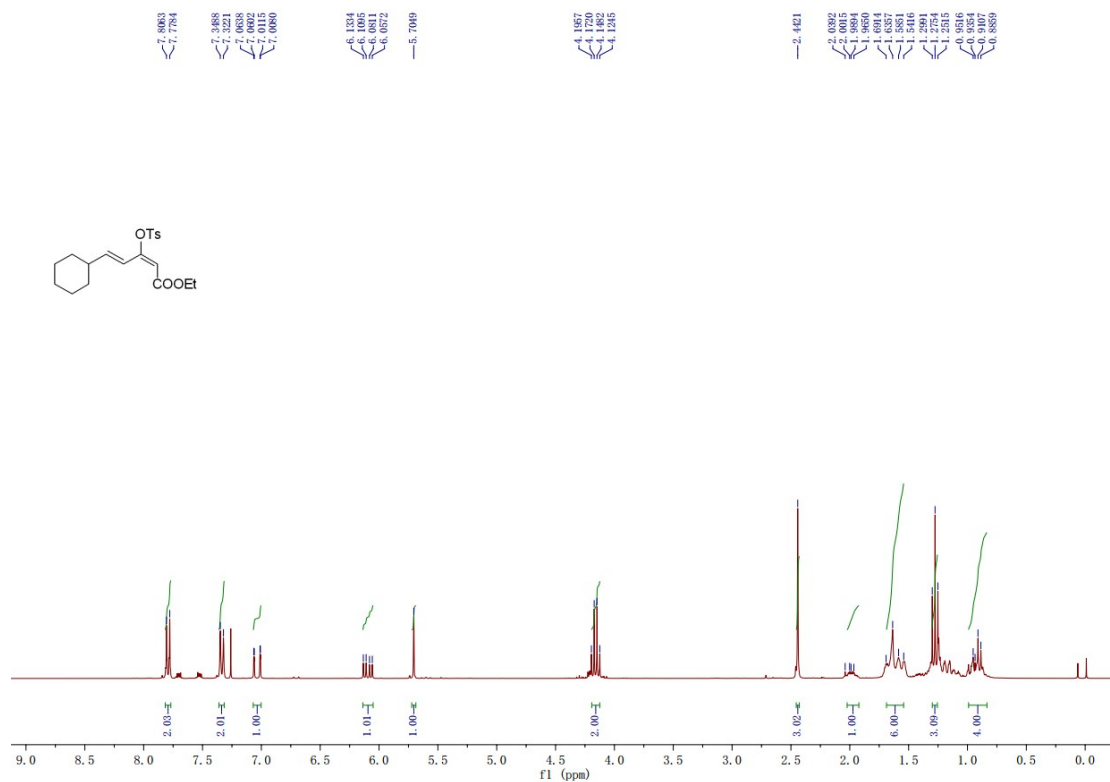

### <sup>13</sup>C NMR spectrum of compound 3k

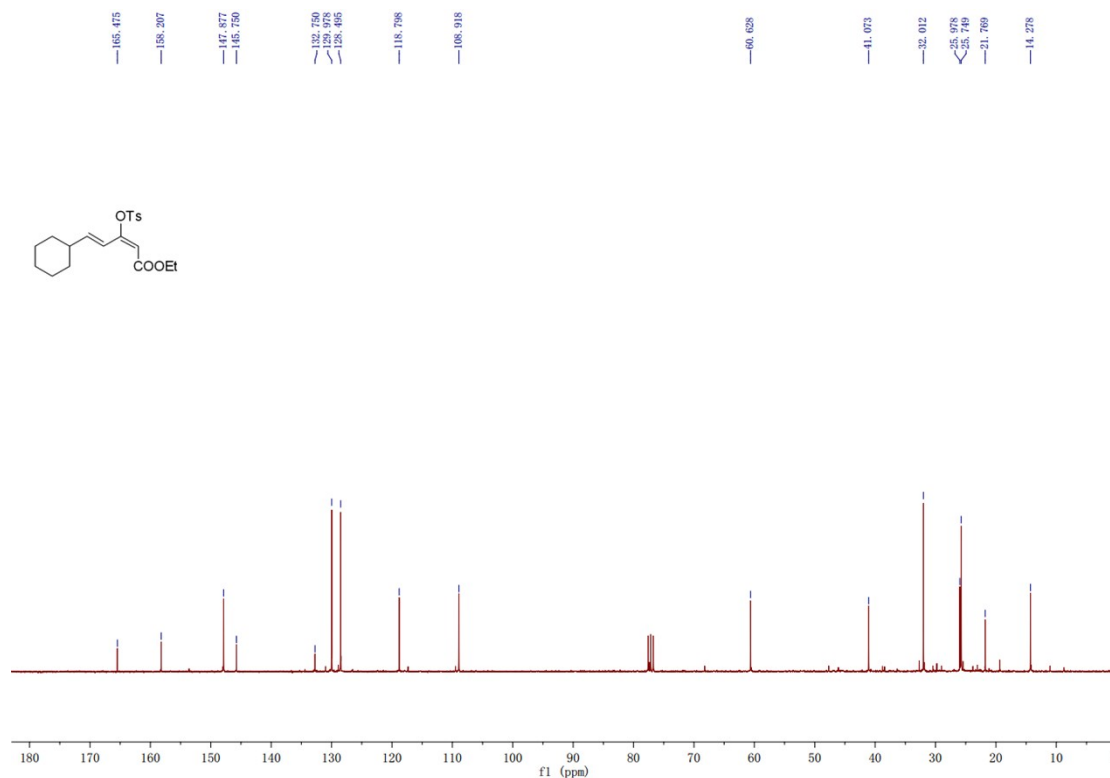

### <sup>1</sup>H NMR spectrum of compound 31

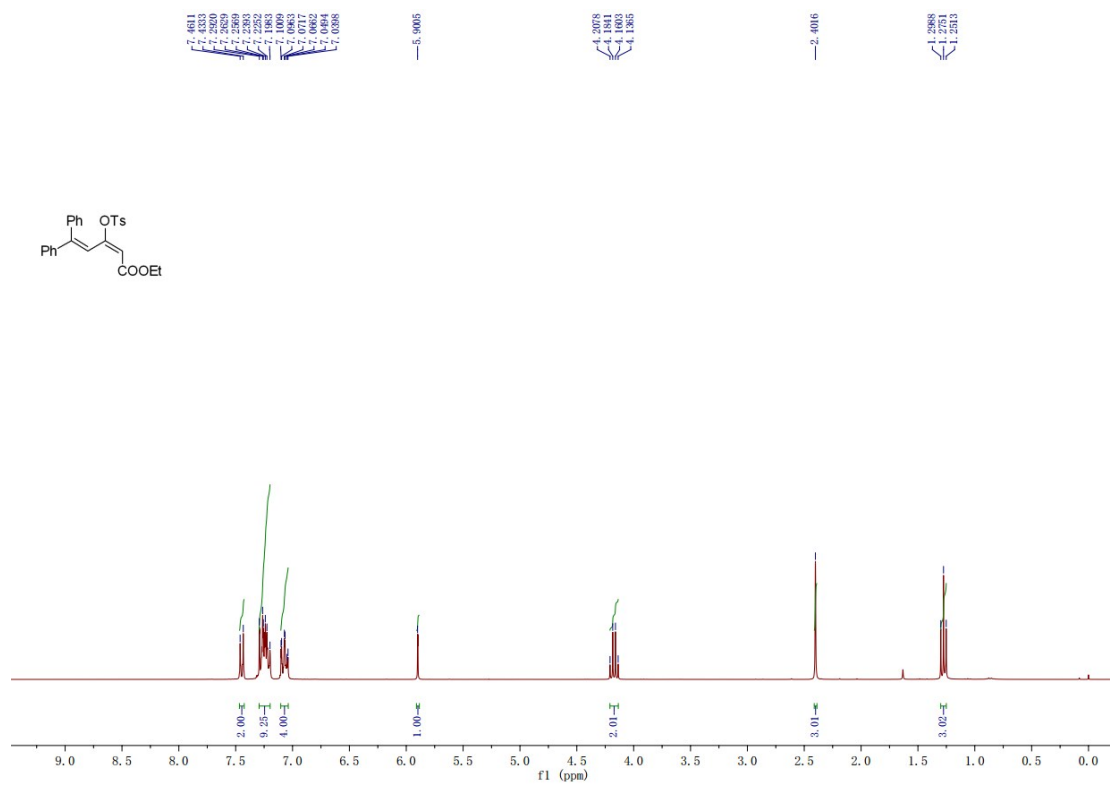

### <sup>13</sup>C NMR spectrum of compound 31

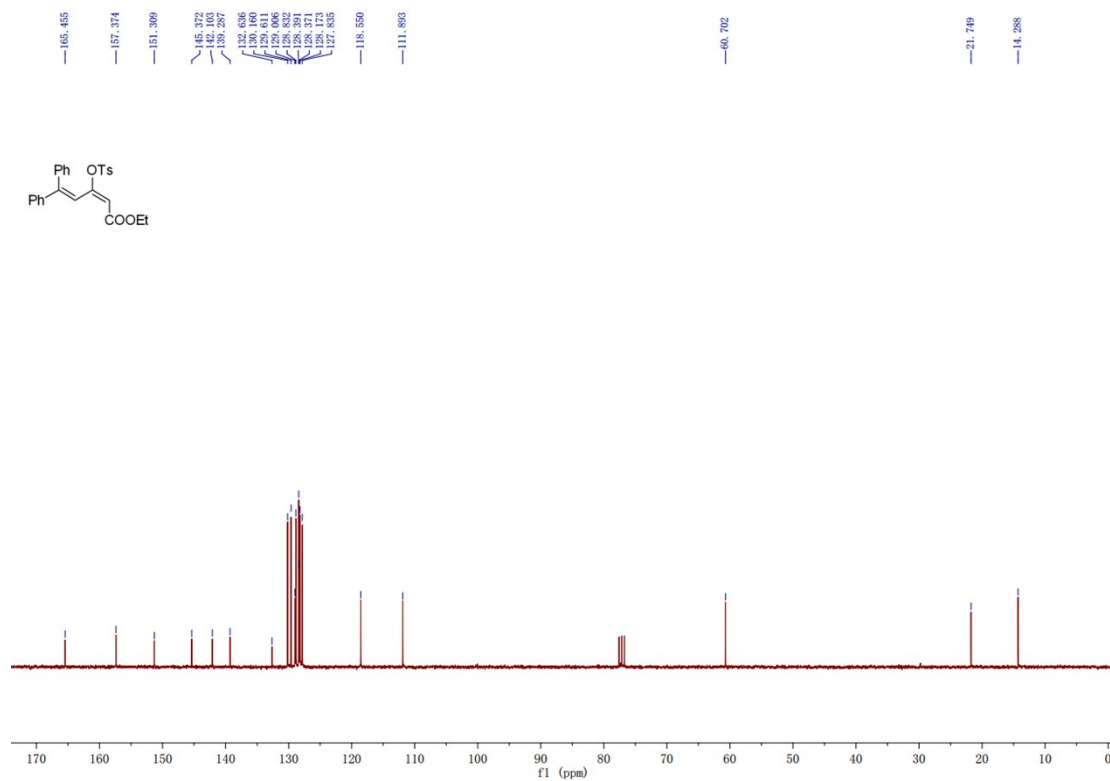

### <sup>1</sup>H NMR spectrum of compound 3m

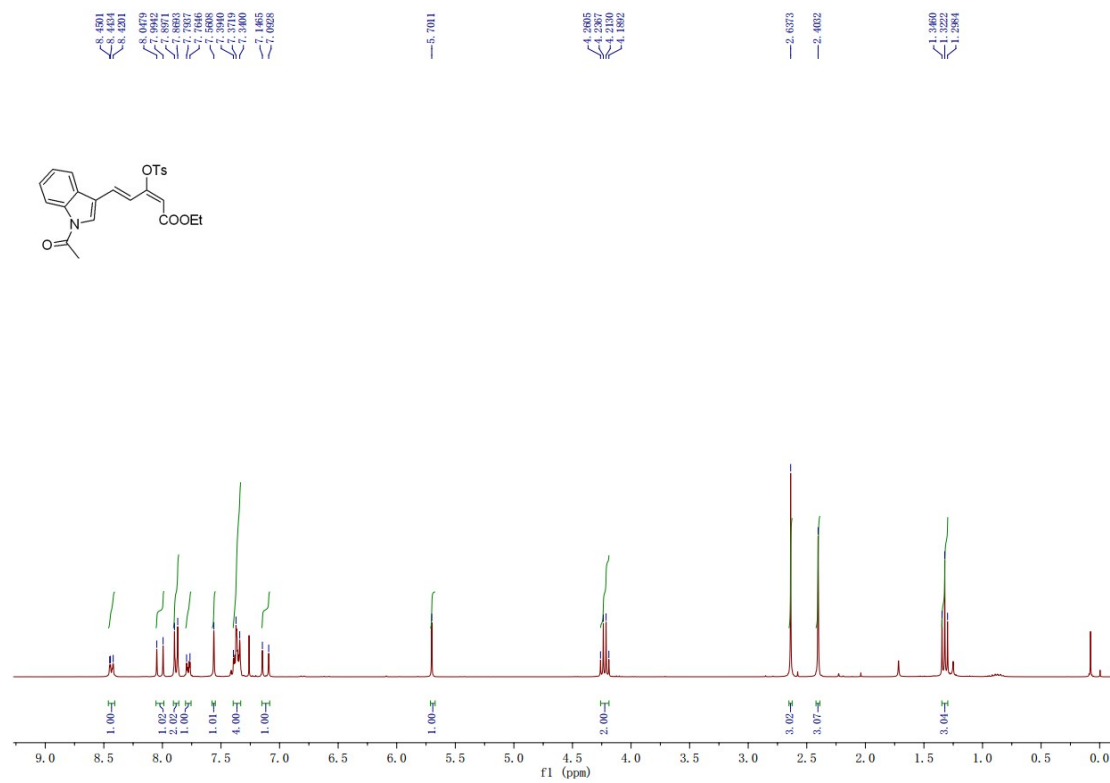

### <sup>13</sup>C NMR spectrum of compound 3m

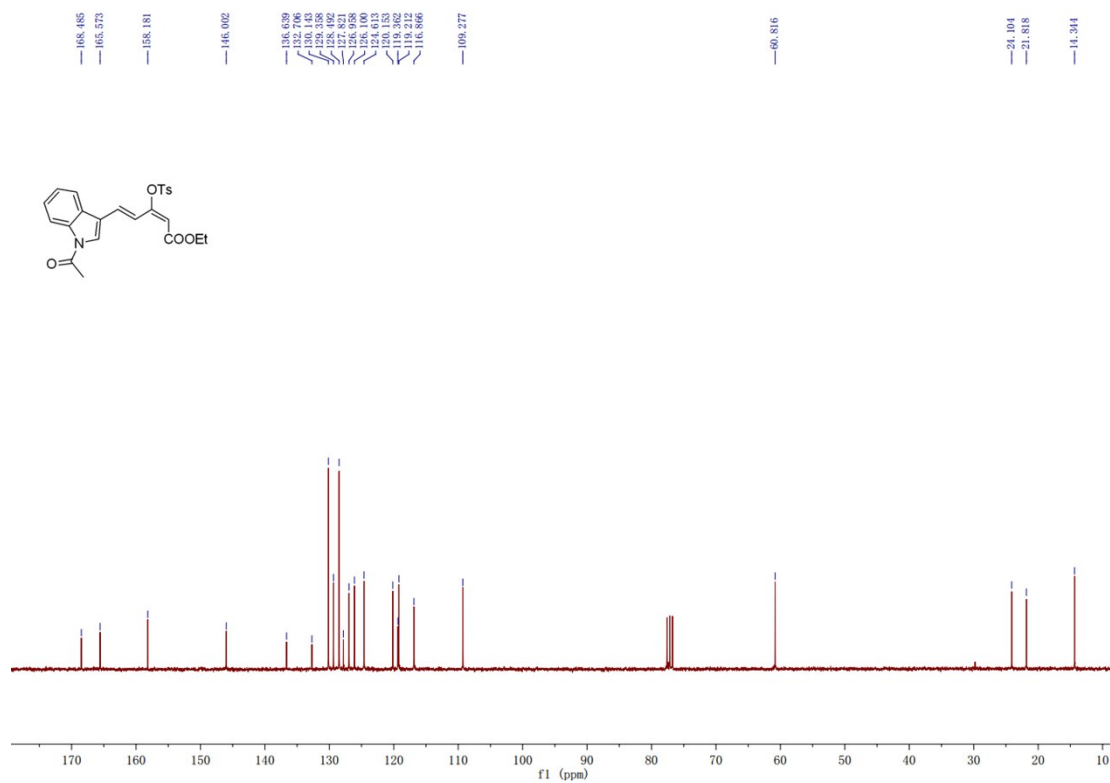



### <sup>1</sup>H NMR spectrum of compound 3n

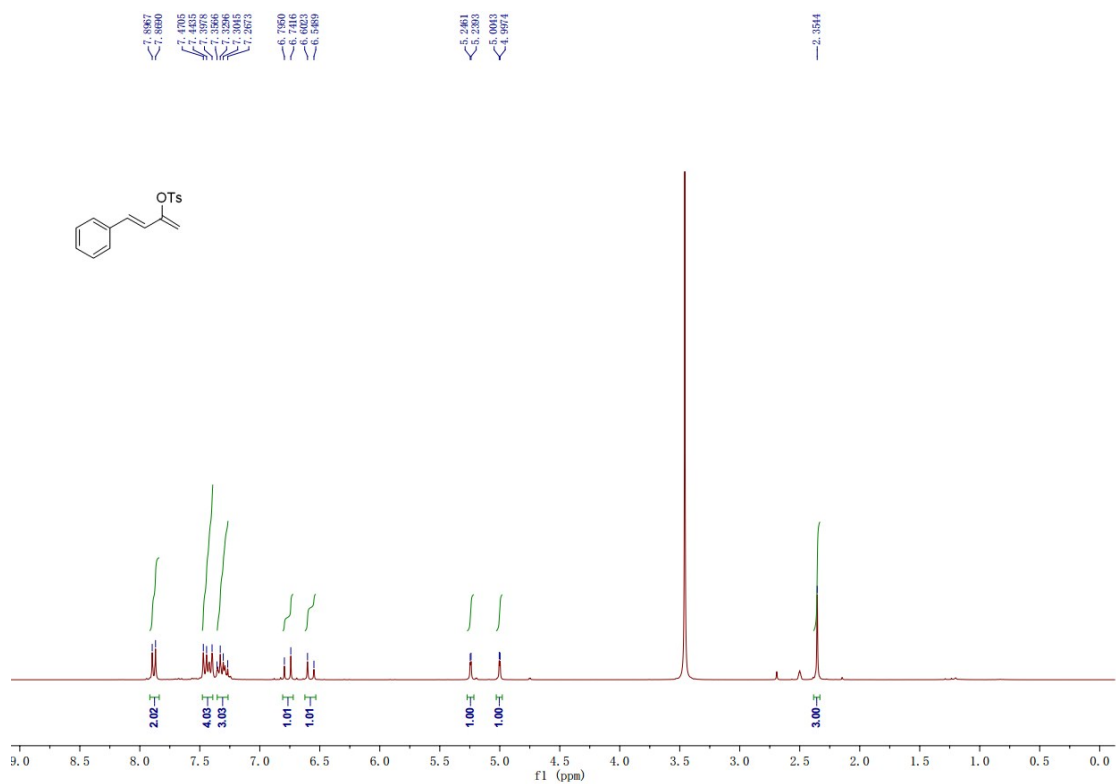

### <sup>13</sup>C NMR spectrum of compound 3n

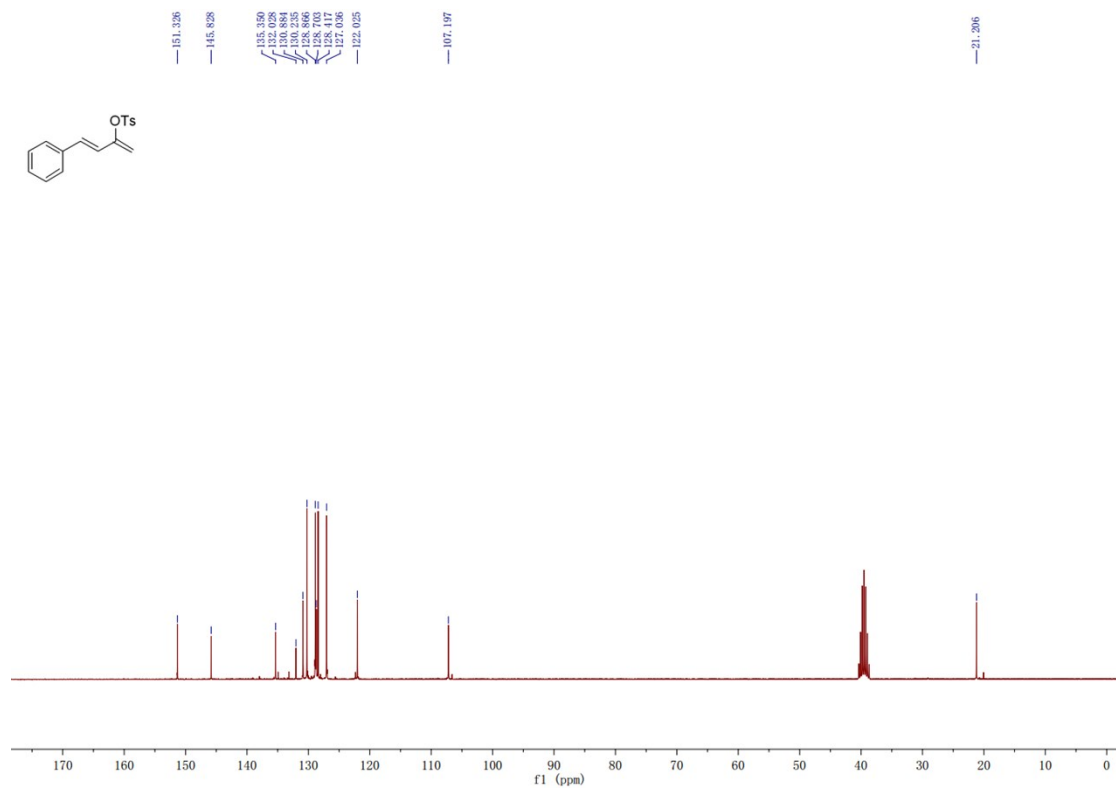

### <sup>1</sup>H NMR spectrum of compound 3o

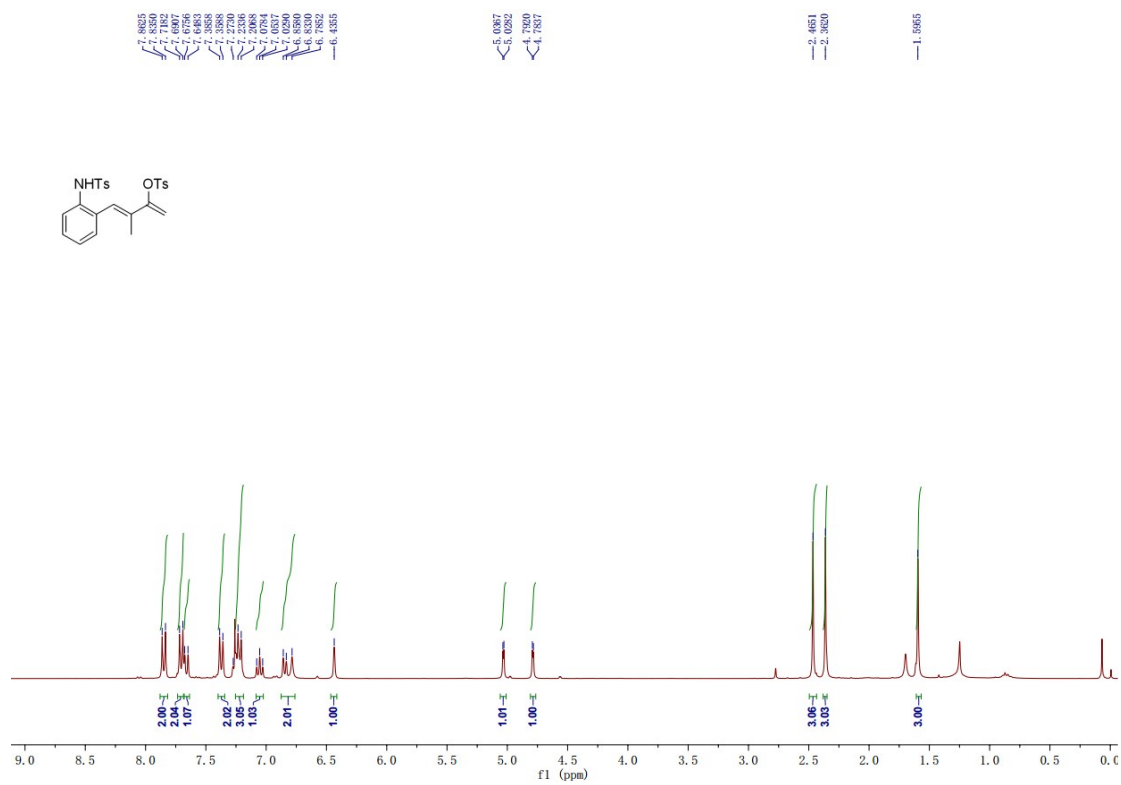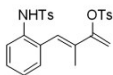

### <sup>13</sup>C NMR spectrum of compound 3o

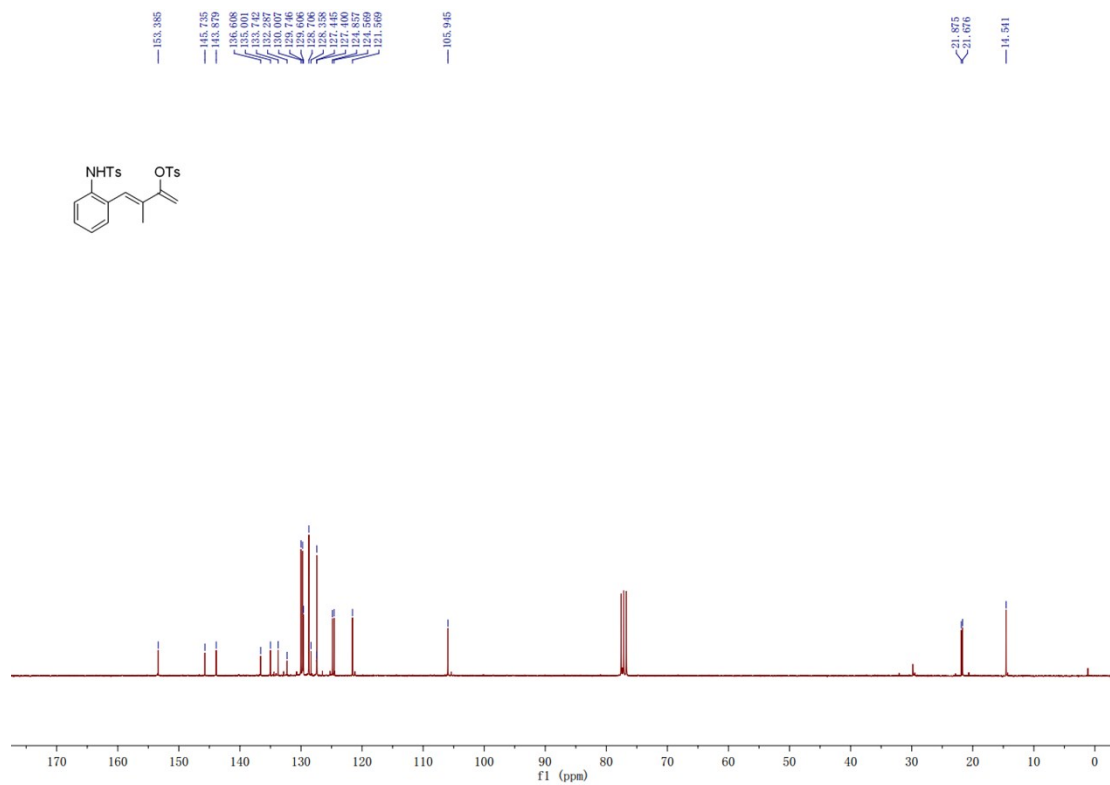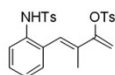

### <sup>1</sup>H NMR spectrum of compound 3p

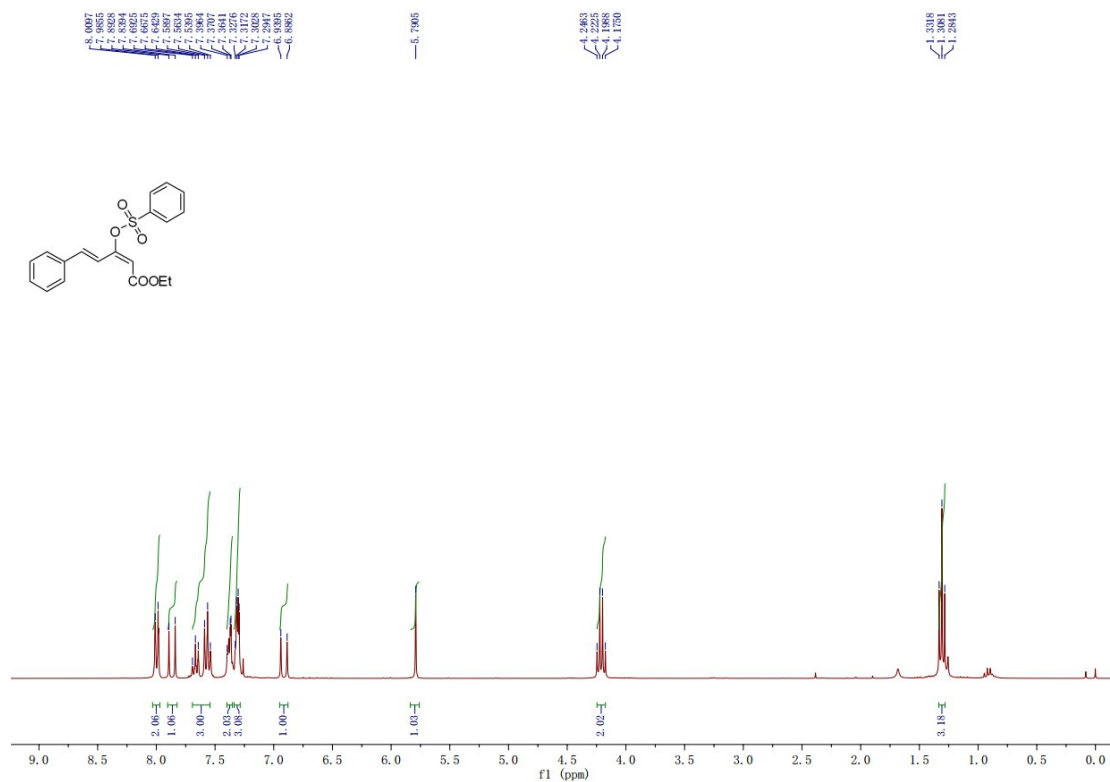

### <sup>13</sup>C NMR spectrum of compound 3p

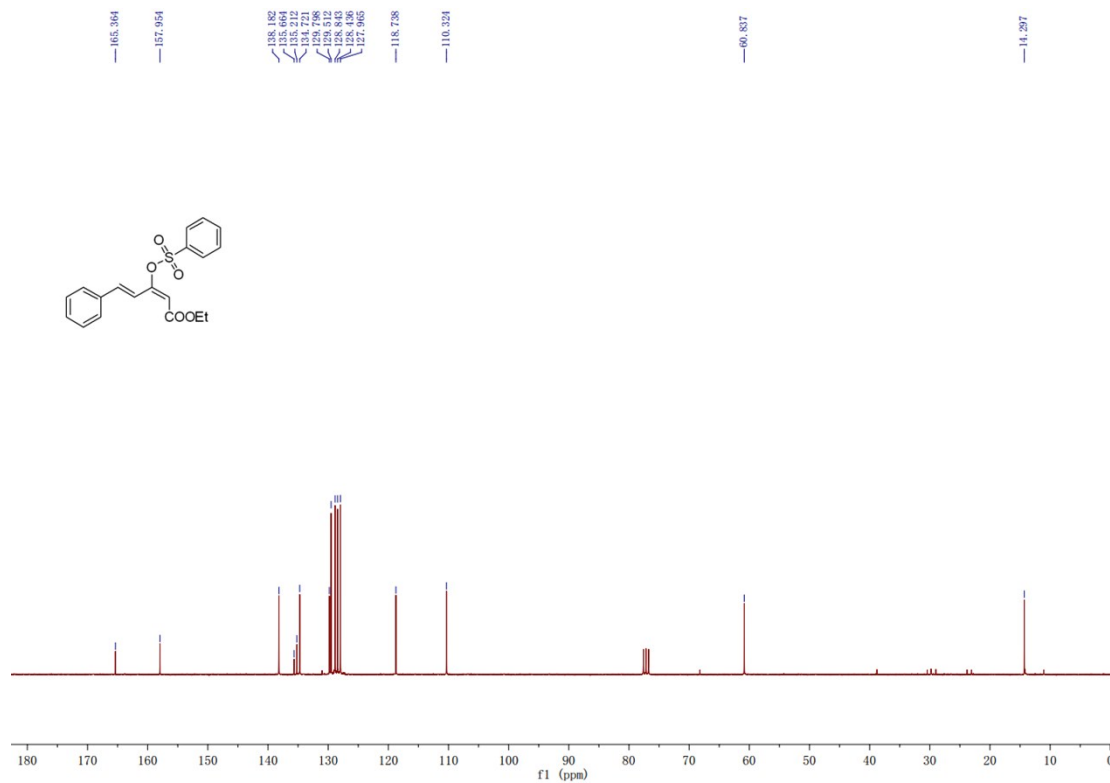

### <sup>1</sup>H NMR spectrum of compound 3q

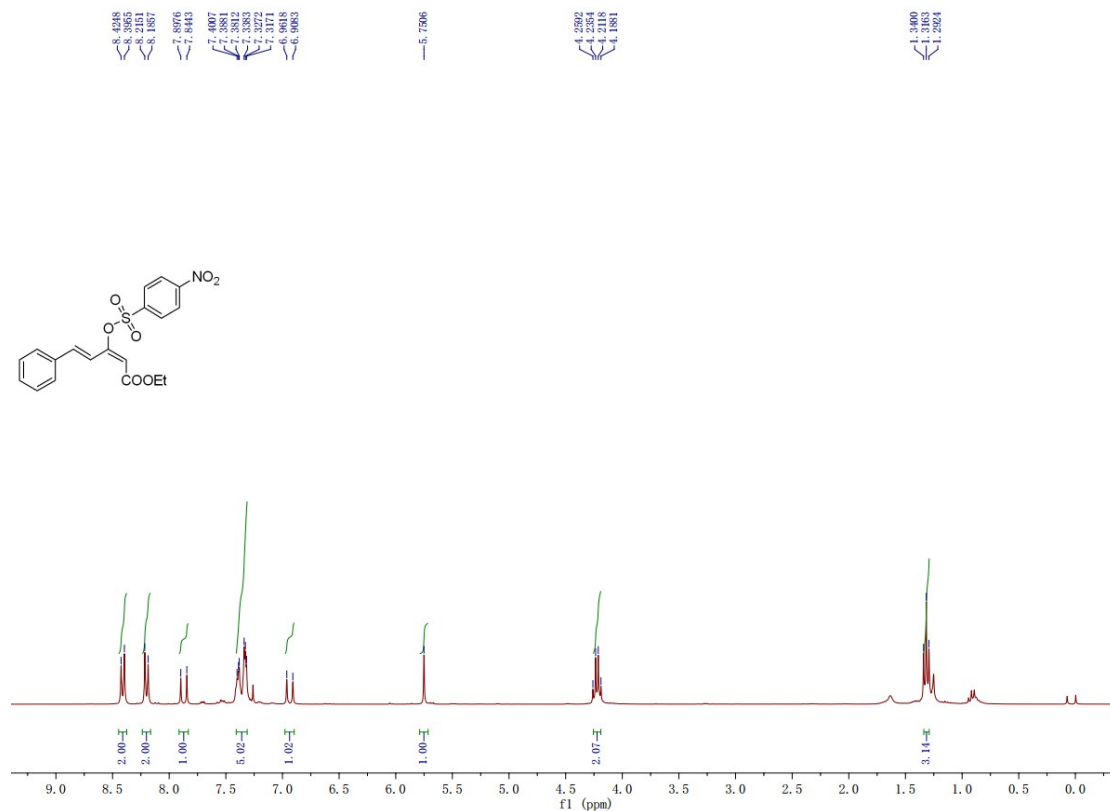

### <sup>13</sup>C NMR spectrum of compound 3q

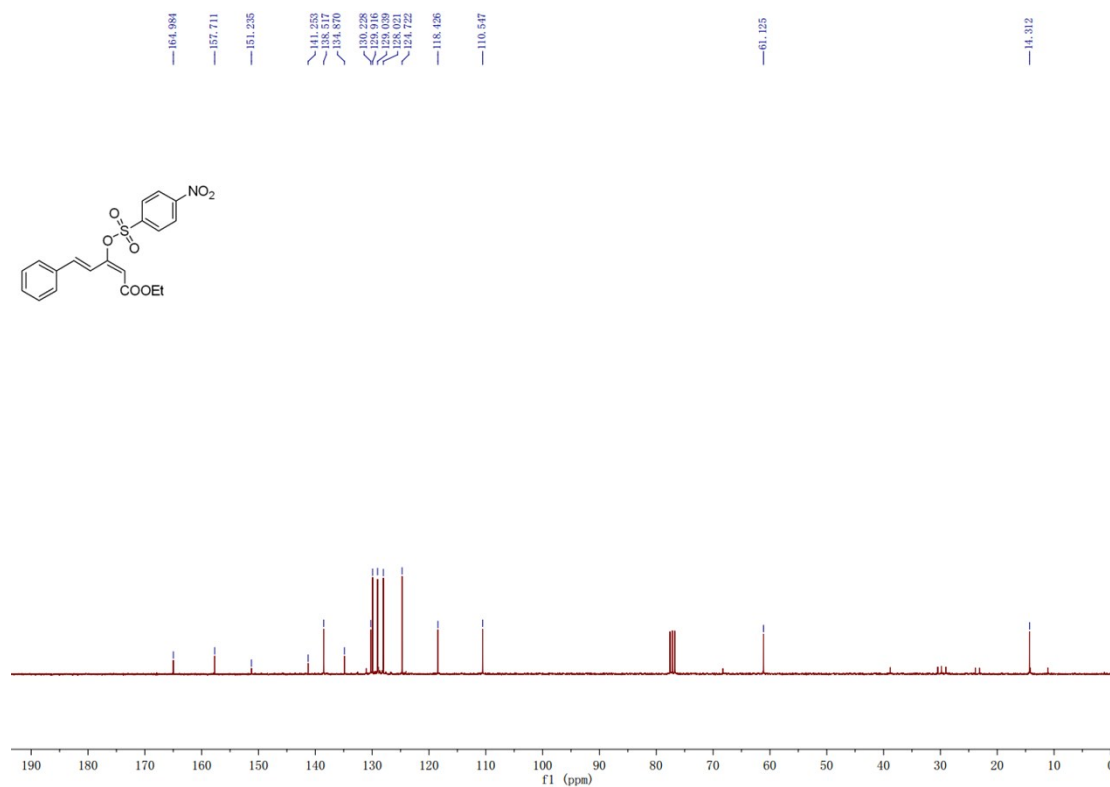

# <sup>1</sup>H NMR spectrum of compound 3r

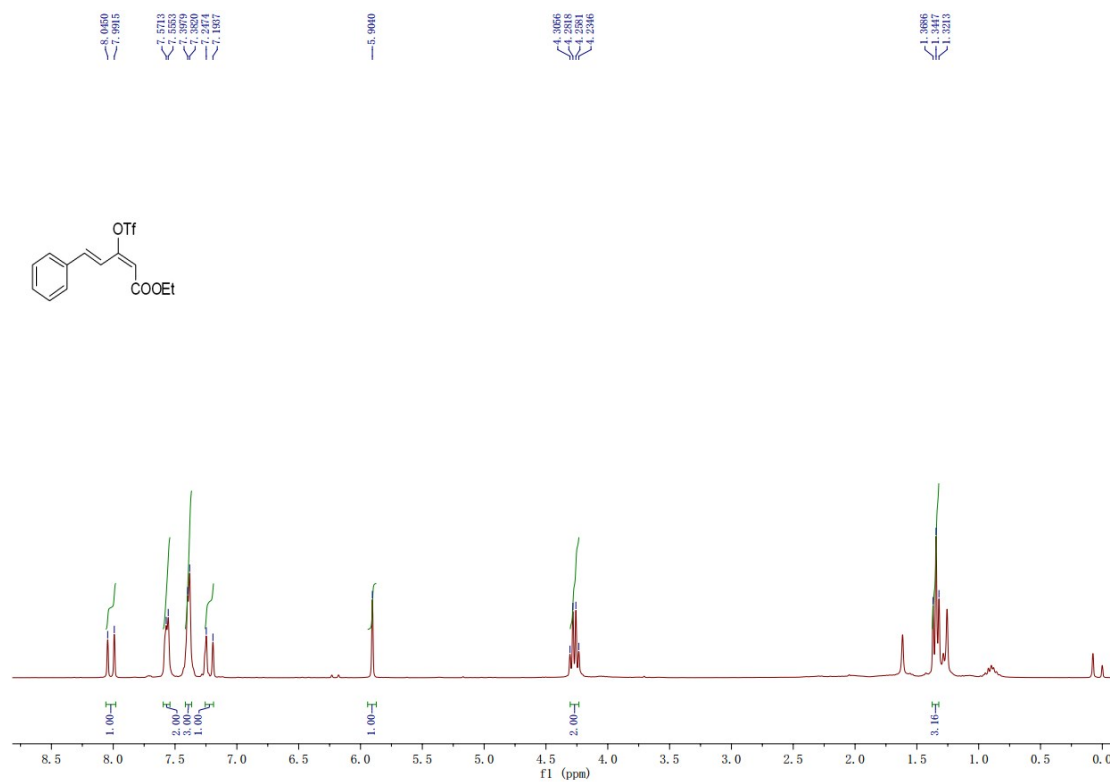

### <sup>1</sup>H NMR spectrum of compound 3s

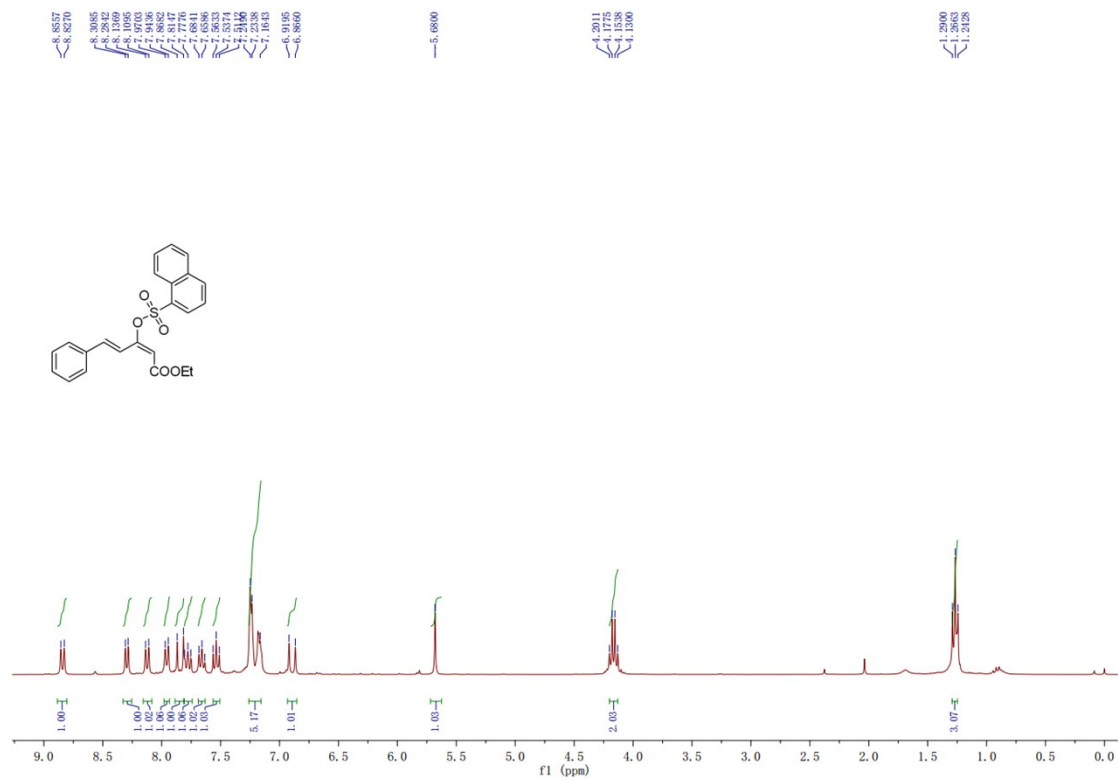

### <sup>13</sup>C NMR spectrum of compound 3s

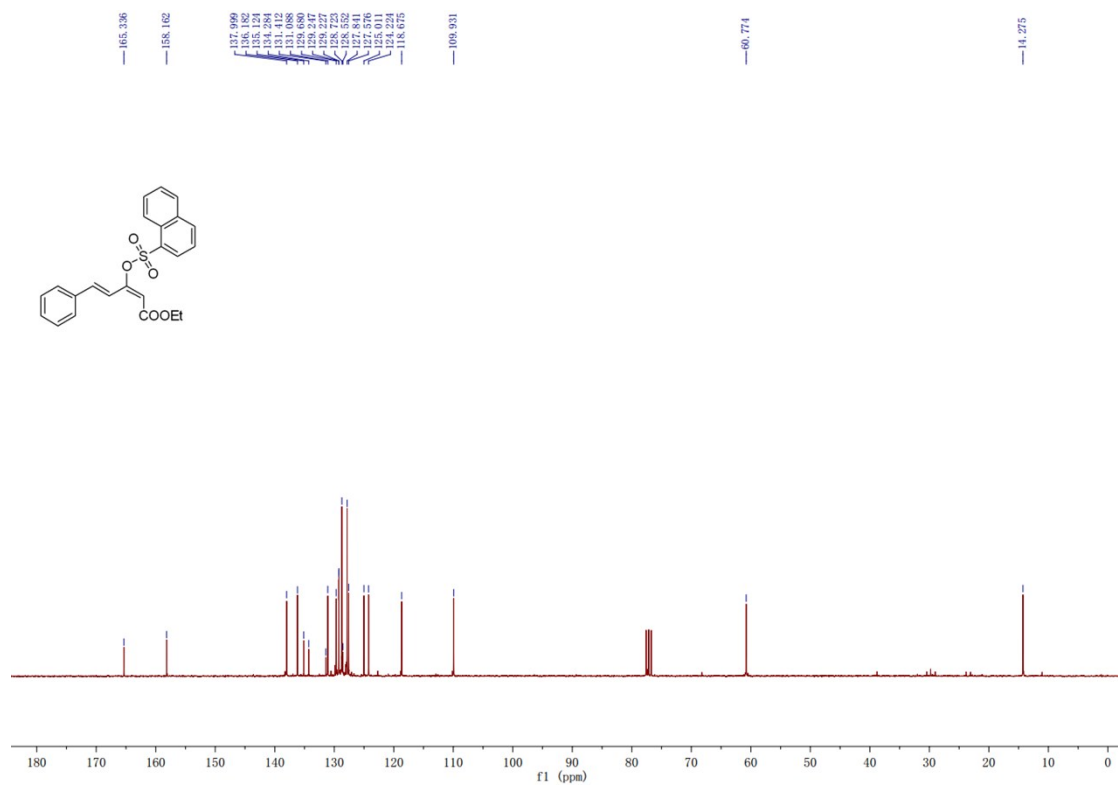

### <sup>1</sup>H NMR spectrum of compound 3t

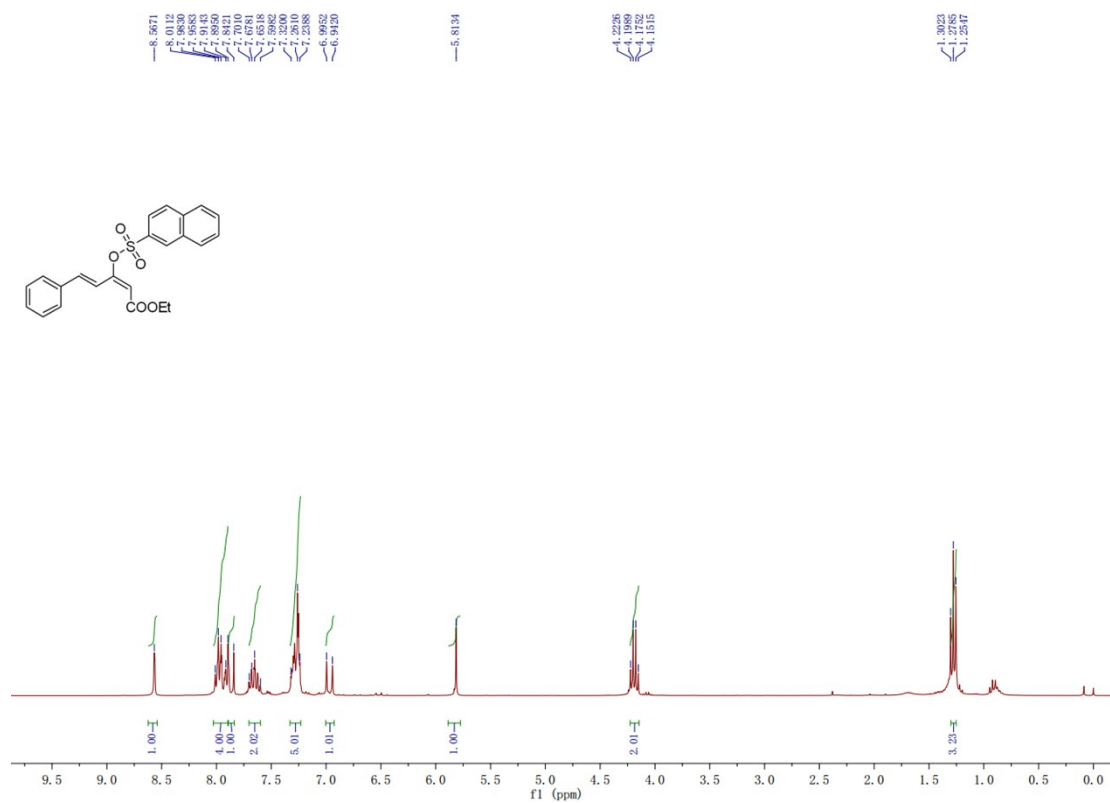

### <sup>13</sup>C NMR spectrum of compound 3t

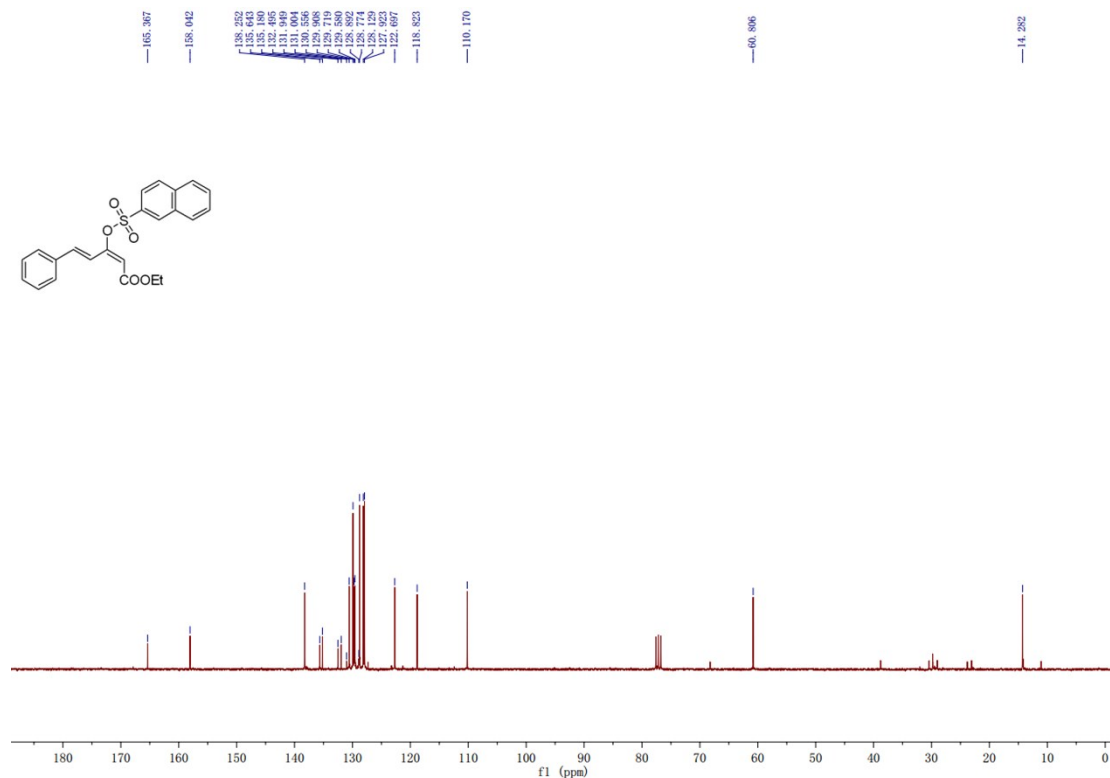

# <sup>1</sup>H, <sup>13</sup>C NMR and NOESY Spectra of 4-8

## <sup>1</sup>H NMR spectrum of compound 4

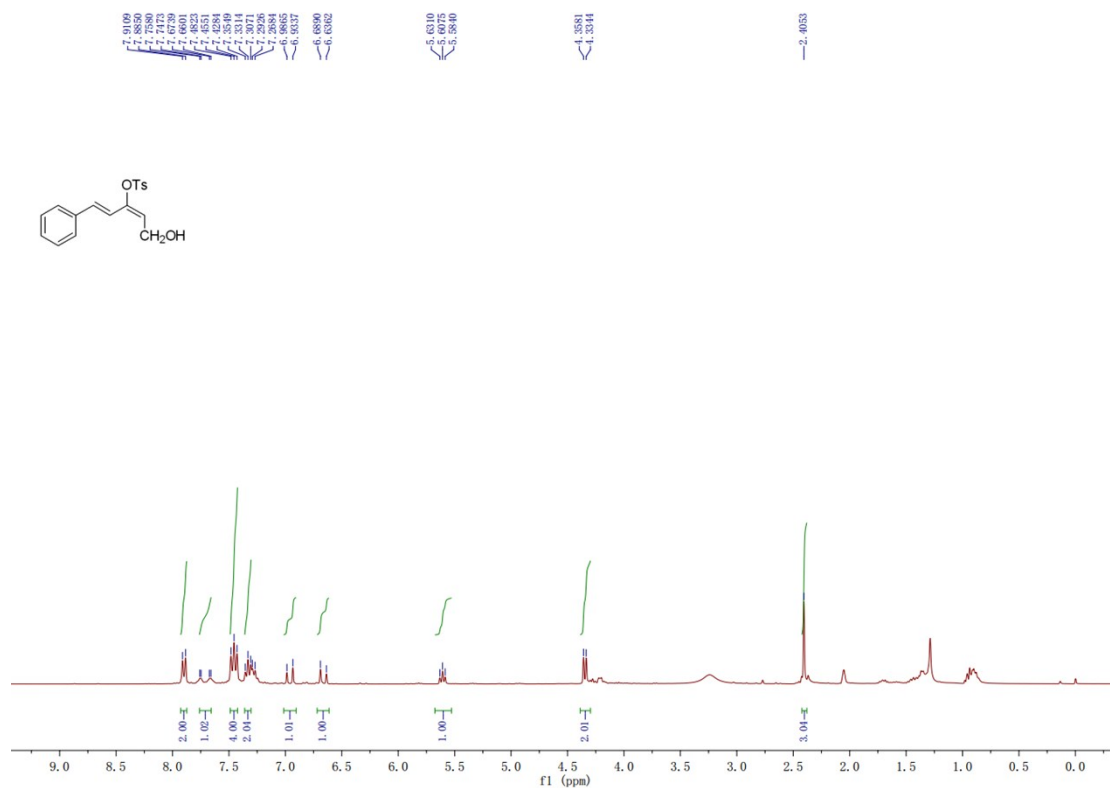

## <sup>13</sup>C NMR spectrum of compound 4

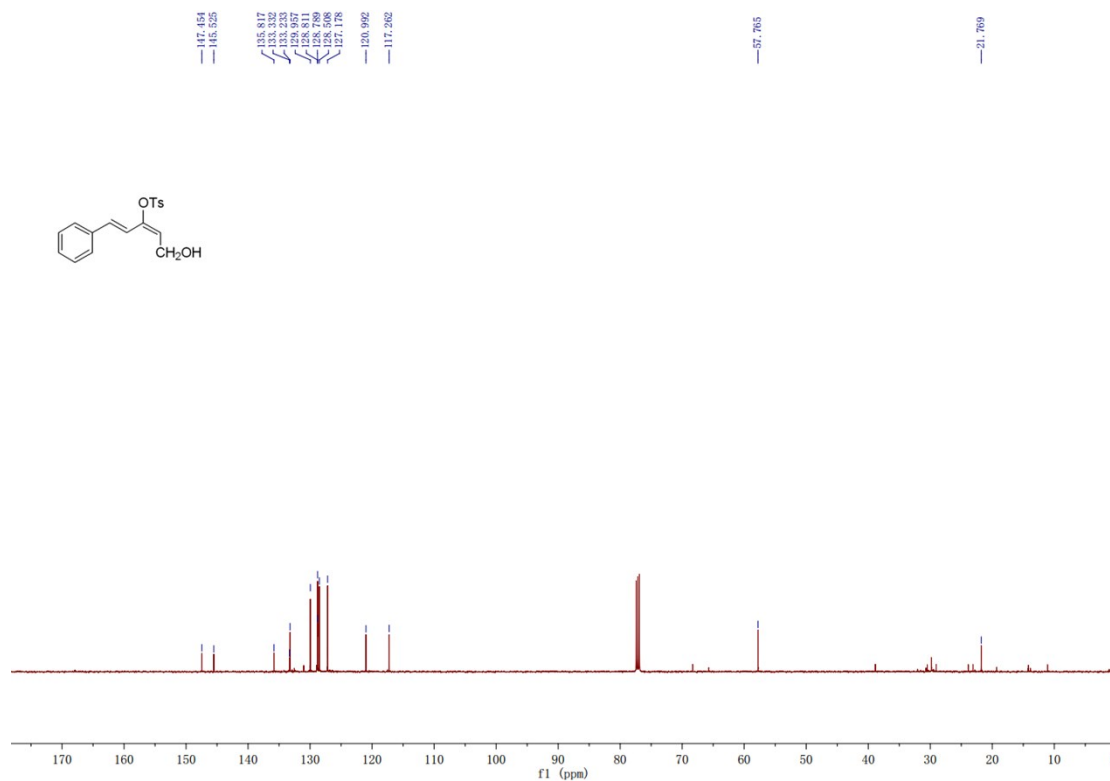



# NOESY NMR spectrum of compound 4

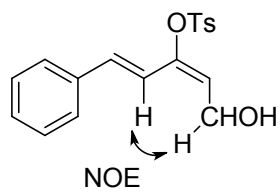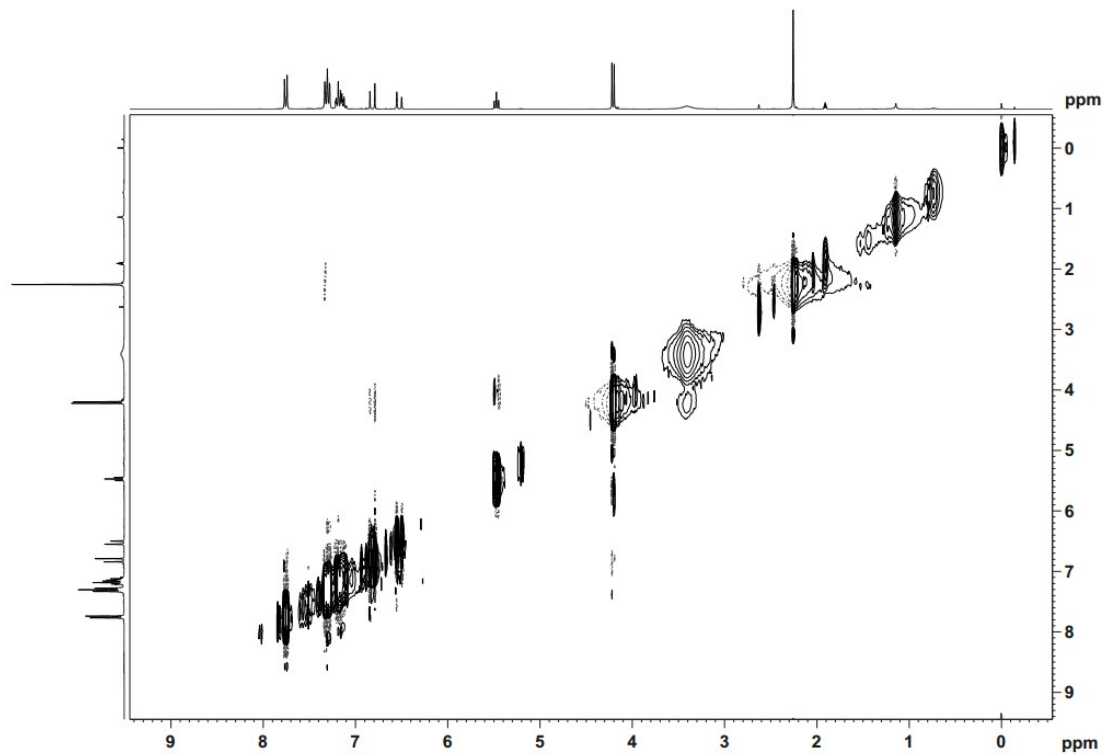



# NOESY NMR spectrum of compound 5

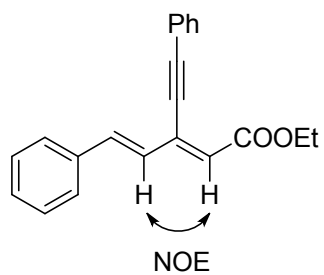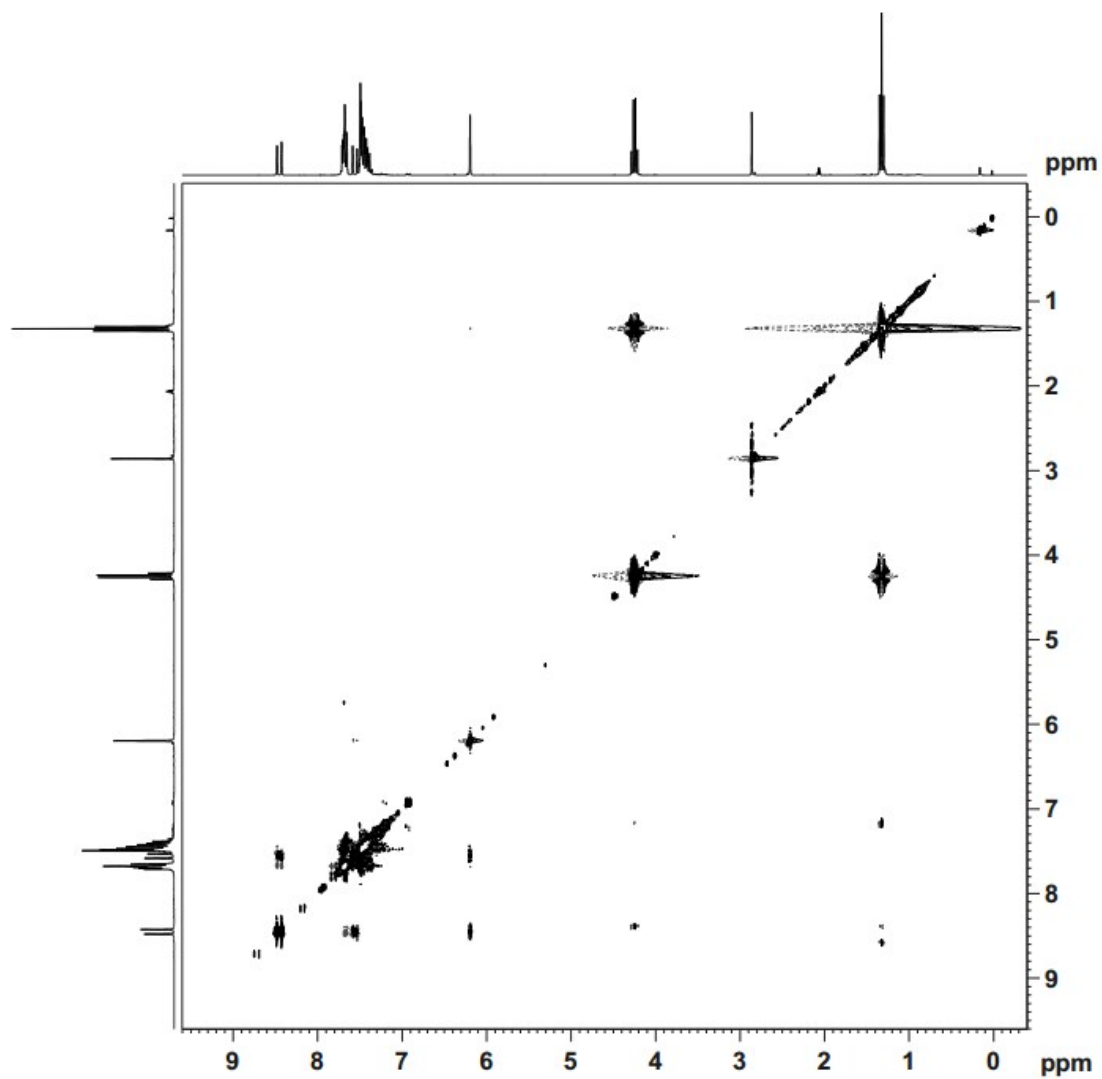

### <sup>1</sup>H NMR spectrum of compound 6

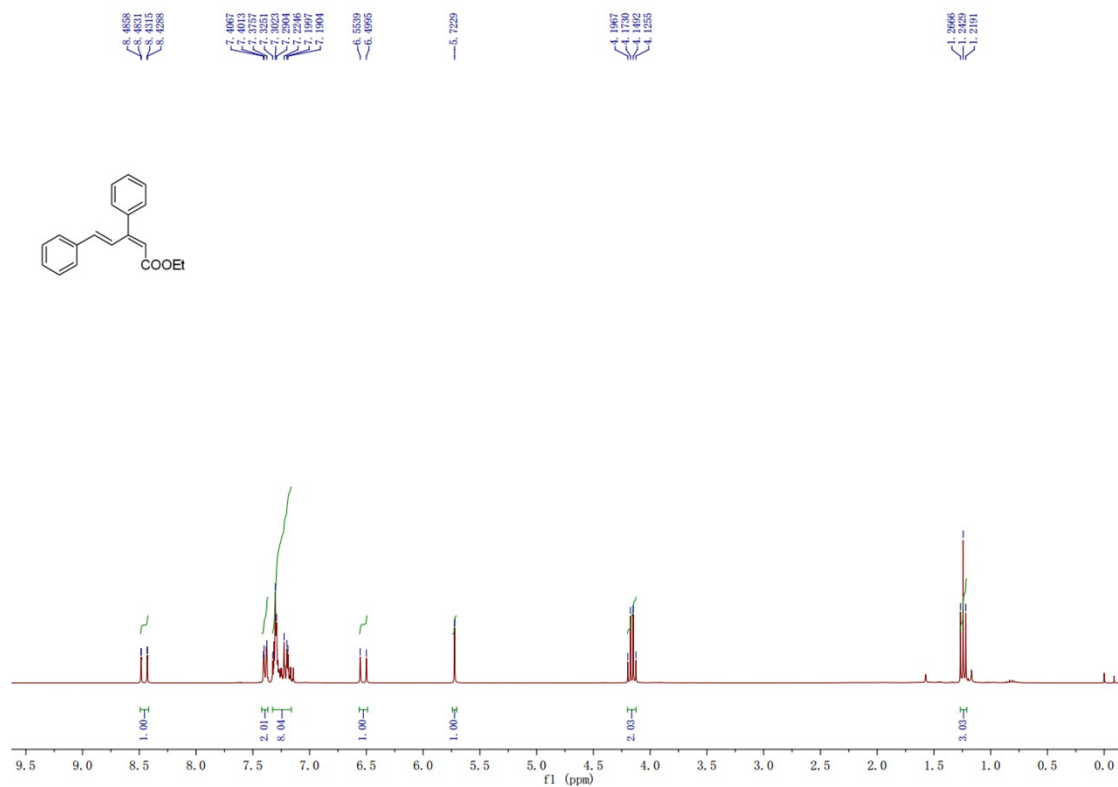

### <sup>13</sup>C NMR spectrum of compound 6

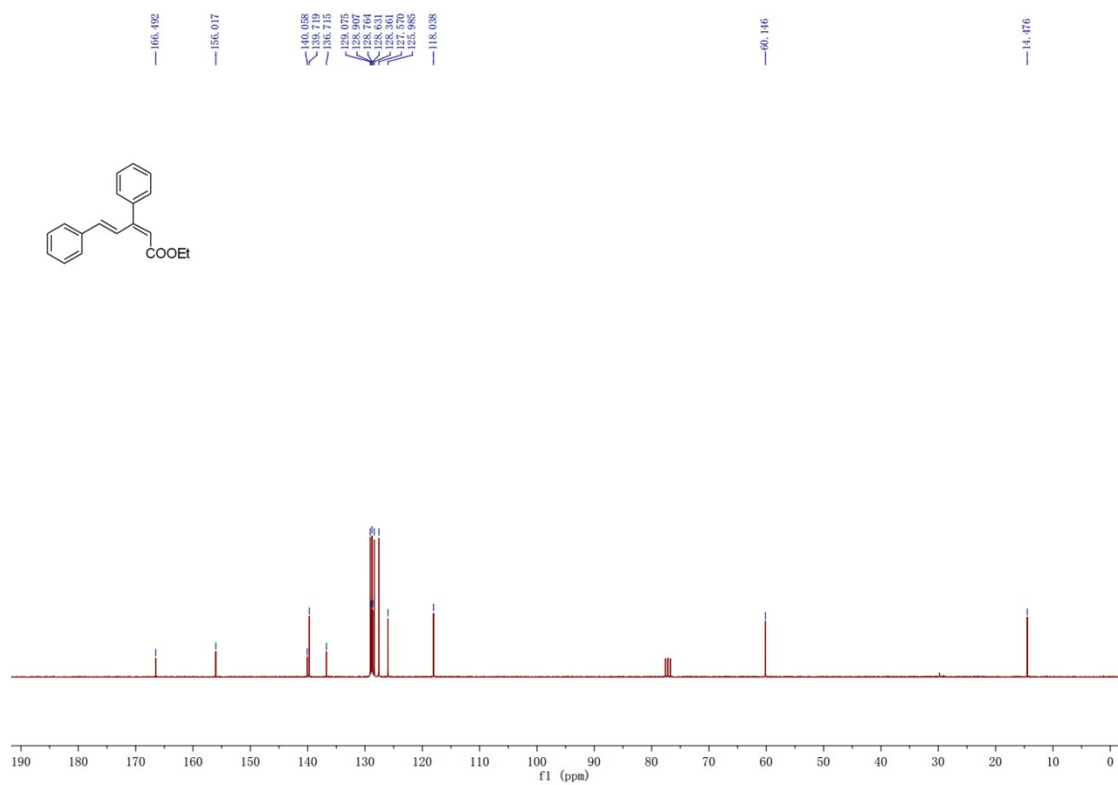



### <sup>1</sup>H NMR spectrum of compound (2*E*, 4*E*)-7

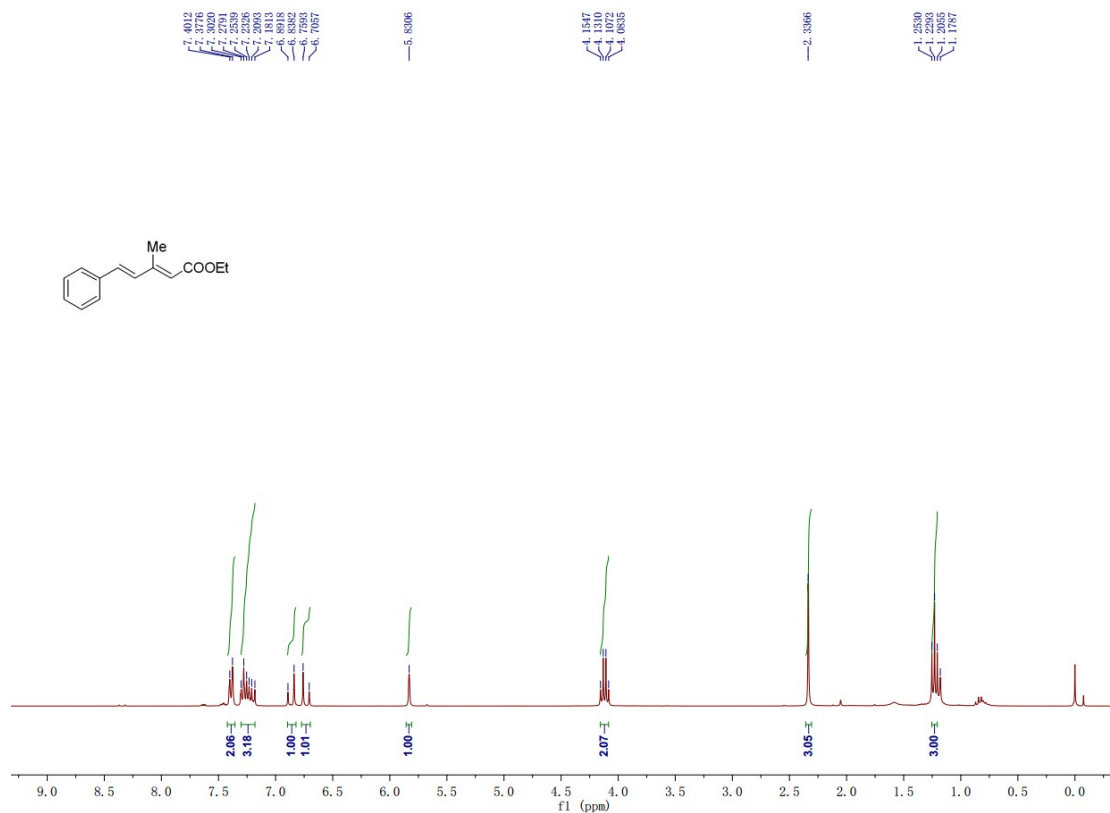

### <sup>13</sup>C NMR spectrum of compound (2*E*, 4*E*)-7

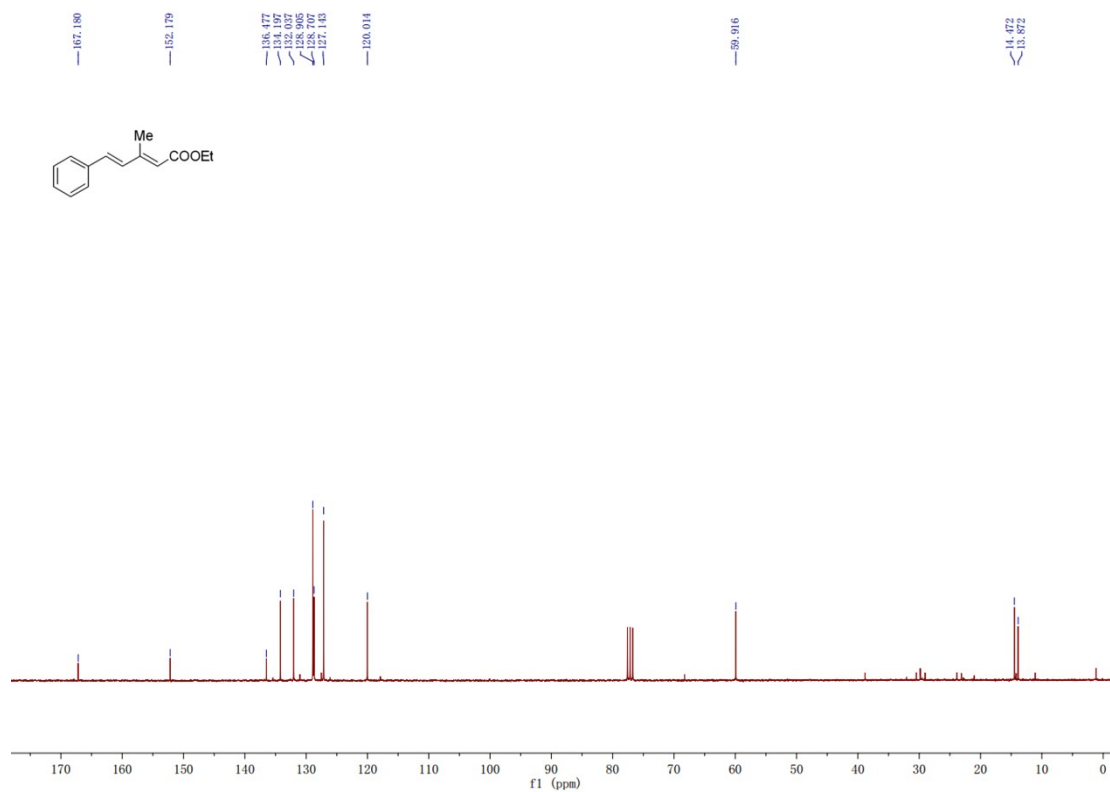

# <sup>1</sup>H NMR spectrum of compound 8

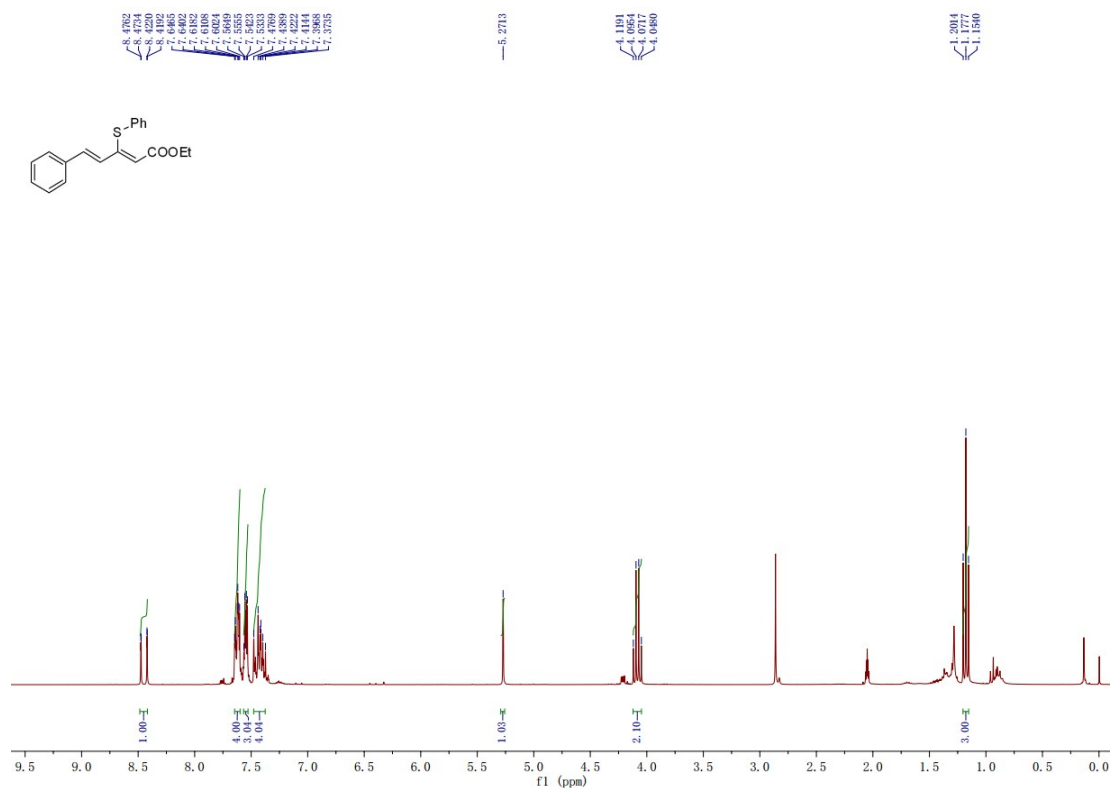

# NOESY NMR spectrum of compound 8

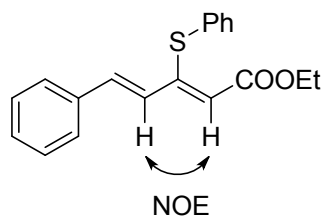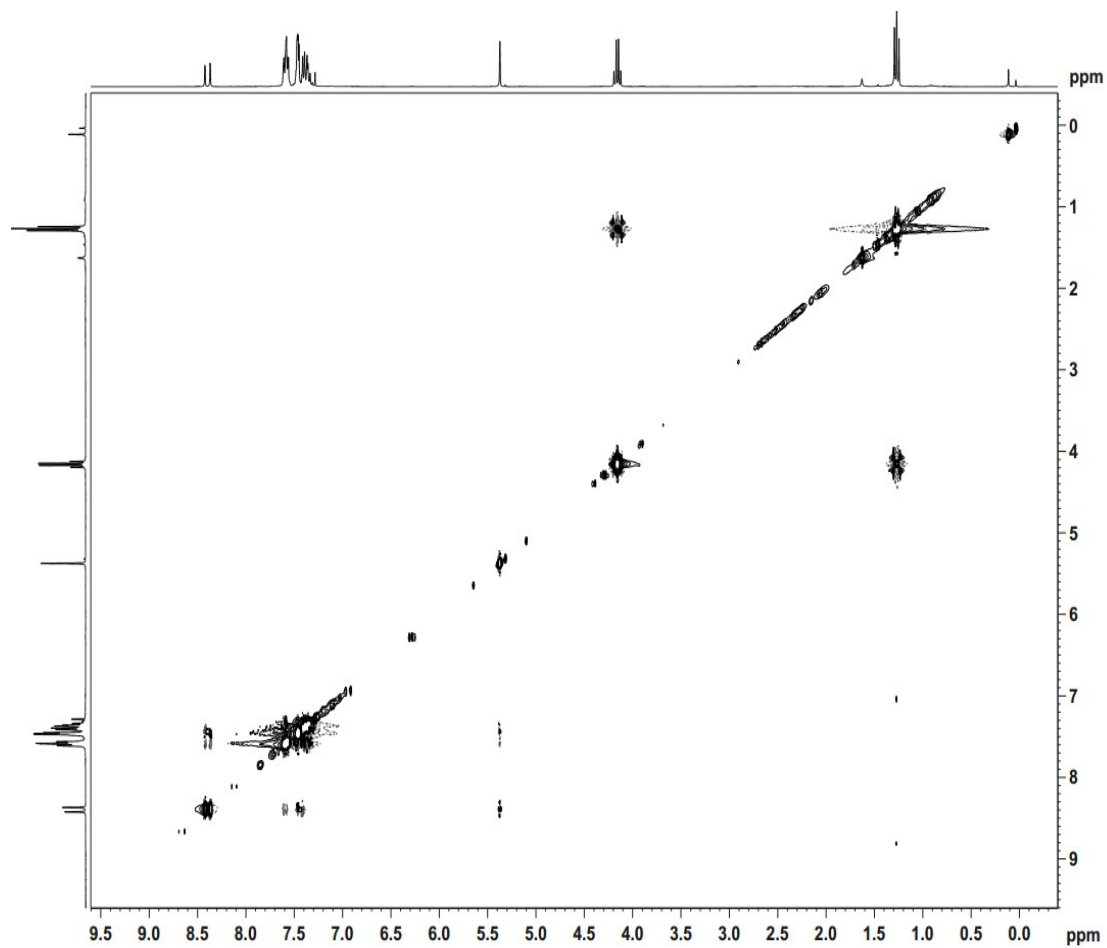

Supplement: c7ob00578d1.pdf [file c7ob00578d1.pdf]
